# Supplementary material for: The development of common data elements for a multi-institute prostate cancer tissue bank: The Cooperative Prostate Cancer Tissue Resource (CPCTR) experience
Source: PubMed Central journal article supplement (PMC1236914; doi:10.1186/1471-2407-5-108), 2005-08-21
Supplement: 1471-2407-5-108-S1.pdf [file 1471-2407-5-108-S1.pdf]

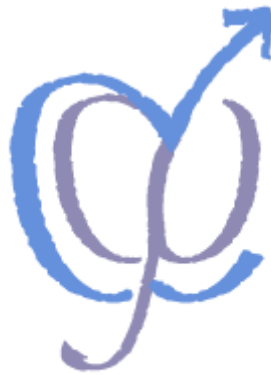

CPCTR

**CPCTR Common Data Elements for  
Collection of Prostate Cancer Specimens  
User Instructions  
Data Dictionary Version 22 (09/14/04)**

## Document History

- 4/10/2000 Initial document by MJB from revised Manual of Operations for CBCTR
- 4/11/2000 Revision by MJB from CPCTR group meeting
- 4/13/2000 Revision and added excel data element workbook by PJT v4
- 5/31/2000 Revision by MJB v5 and update of excel data element workbook v5
- 6/13/2000 Revision by MJB v6 with incorporation of Pathology Committee recommendations
- 6/13/2000 Revision by MJB v6 elements into groups (demographics, clinical history & progression info, therapy, pathology and block matrix)
- 6/29/2000 Revision by MJB v7 changes recommended 6/13/00
- 7/16/2000 Conference call with Jonathan Melamed 7/16/00
- 7/19/2000 Revision by MJB from Conference call on 7/16/00
- 8/8/2000 Revision by MJB in response to changes with CPCTR Prostatectomy Form see CPCTR Prostatectomy form MBv4 0808000.doc.
- 8/9/2000 Revision by MJB to add prostate needle biopsy elements to data form and CDE list and "normal" block elements.
- 8/24/2000 Revision and margin notes by MJB related to discussions at Coordinating Committee at GWU for prostatectomy and "qualification" of cases.
- 8/25/2000 Revision and margin notes by MJB related to discussions at Coordinating Committee at GWU for needle biopsies, TURP and metastatic non-prostate tissues.
- 10/12/2000 Revision from 8/25 meeting notes and short form of CDE for non-central review by PA, data managers
- 01/25/2001 Revision from 1/18-19 meeting in NY and from conference call on same date
- 03/22/2001 FINAL REVISIONS to both Prostatectomy and Needle Biopsy for cases with Prostatectomy.
- 05/10/2001 Revision by MJB from discussions at the Pittsburgh meeting.
- 07/05/2001 Pre-final revisions by MJB based on teleconference and e-mails
- 07/15/2002 Revisions added by MWD after review and discussion with AAP.
- 08/19/2002 Revisions by AAP after data-managers(7/24/02) and CDE committee(8/14/02) conference calls.
- 09/30/2002 Added logic testing from PITT, MCW. No additional logics from NYU and GWU.
- 10/24/2003 Approval by Coordinating committee to add new metastatic elements and therapy matrix and drop elements with low reporting data.
- 03/05/2004 Reformatted complete CDE data dictionary and revision of ACCESS database to include metastatic specimens and therapy matrix table. Sent to CDE listserver for approval. Data managers conference call (03/11/2004).
- 09/14/2004 Marking Critical data elements: 1) required CDEs [marked as \*] 2)Conditional required fields [marked as \*\*]

## **CPCTR Participating Institutes**

George Washington University Medical Center  
Howard University Medical School  
Medical College of Wisconsin  
New York University  
University of Pittsburgh

For additional information regarding the CPCTR  
common data elements, database, or any of the  
tissue resources available, please e-mail us at  
[ASK-CPCTR-L@LIST.NIH.GOV](mailto:ASK-CPCTR-L@LIST.NIH.GOV).

## Criteria for inclusion of cases

A. Any Case with at least ONE SPECIMEN/BLOCK with tumor present, whether it be prostatectomy, biopsy, regional lymph node, or metastatic tissues, can qualify the case to be included in the CPCTR Resource.

### **B. Pathology Criteria for case inclusion in CPCTR Frozen Tissue Prostatectomy archive**

- The only criteria we recommend currently are:
- 1) At least 1 neoplastic block or more need to be able to be entered into the matrix or case is excluded.

### **C. Priorities for entering cases in prostatectomy neoplastic block matrix**

- These should assist the teams in picking the highest value blocks for the CPCTR archives.
- Since the matrix can include up to 5 blocks here are the recommendations for selection criteria:
  - 1) The first block should include the largest nodule of tumor (as specified by the CDE)
  - 2) The third through fifth blocks should include seminal vesicle invasion, ECE or angiolymphatic invasion (in that order of preference)
  - 3) The second block should include the largest amount of PIN and preferred is an area of PIN that is independent of cancer (if that exists). If the blocks with PIN all also contain cancer that does not exclude them. Try then to pick a block that has the largest amount of PIN.

### **D. Needle biopsy (in cases with prostatectomy) CDE archive notes**

- For needle biopsy cases, the concern was to give the reviewers some guidance on how many blocks to submit and to clarify what happens when there is only one block with tumor. In these cases it was recommended that the institution cut 3 to 5 blanks for their own diagnostic purposes and then make the residual material available to the CPCTR archive
- We decided that a matrix would be set up and leave the number of blocks submitted to the reviewing pathologist, encouraging them to submit as many blocks as possible on a needle biopsy to a maximum of 5. There is no particular order for entering blocks into the needle biopsy matrix.
- Here are the recommended criteria for needle biopsy (in cases with prostatectomy):
  - 1) Can include one block or more (up to 5)
  - 2) Must at least include one block and classify according to the needle biopsy matrix.

## **Policy Statements**

### Controlled Dictionaries:

Following the lead of other resources at NCI we will follow a “controlled dictionary” CDE policy. In short, every data element definition will include acceptable data values unless otherwise noted. IMS will only test for and process controlled dictionary values.

### \* Required Items:

Records submitted with missing or invalid data in any one (or more) of these fields (indicated with an asterisk) will not be loaded into the central database. The respective site will receive a report indicating which record(s) have been loaded and which rejected and why. The site must correct the error and resubmit the record to the central database.

### \*\*Conditional Required Fields:

Any Case with at least ONE SPECIMEN/BLOCK with tumor present, whether it be prostatectomy, biopsy, regional lymph node, or metastatic tissues, can qualify the case to be included in the CPCTR Resource. Therefore, the respective CDEs below must be filled in for the specific tissue matrix (i.e. Prostatectomy, biopsy, regional lymph nodes, or metastatic tissues) available to the Resource.

### Non-required Items:

Records with any errors or invalid data in non-required fields will be flagged. The respective site will receive an error report listing all case numbers with errors along with a description of the errors. Errors should be reconciled and the corrected records resubmitted within 30 days.

### Submission of data files to IMS:

Data files will be composed of exported Excel files from the MS-Access data entry tool developed by IMS. IMS will process the data using the policies, variable constraints and logistical tests documented herein. Accepted records will be loaded into the central database. Unacceptable records will not be loaded into the database but returned to the submission site for review and correction. IMS will document the reasons for rejection when the unacceptable records are returned for correction.

### Resubmission of records:

Only records that have been corrected should be resubmitted to the central database.

### Not Available:

If data element value is not present (non-required elements only), the assumptions are that the data is not available. No special code need be used to define “not available”. Not available is to be interpreted as unknown, not defined, not counted, etc.

# Demographics

## 1. Hospital Identifier

Definition: **Identified ID (i.e. SS# or Medical Record#, etc.) for each case in the Cooperative Prostate Cancer Tissue Resource.**

Data Type: Character String

Table: tbl\_Case\_Identifiers.str\_Hospital\_Identifier

Validation

Rules:

Comments: This field is NOT EXPORTED to the CPCTR. ONLY THE HOST SITE WILL HAVE ACCESS TO THE LINKAGE INFORMATION. Its purpose is to:

- 1) Be the primary key in all of the child tables linking to the parent table within the database.
- 2) Allow each site to index their cases so that they can link back with the de-identified data for follow up and QA purposes.

| Value     | Value Description                             |
|-----------|-----------------------------------------------|
| Free Text | Open text field (250 alphanumeric characters) |

## 2. Last Name

Definition: **Last name of patient.**

Data Type: Character String

Table: tbl\_CPCTR.str\_Last\_Name

Validation

Rules:

Comments: This field is NOT EXPORTED to the CPCTR. ONLY THE HOST SITE WILL HAVE ACCESS TO THE LINKAGE INFORMATION. Its purpose is to:

- 1) allow each site to index their cases so that they can link back with the de-identified data for follow up and QA purposes.

| Value     | Value Description                             |
|-----------|-----------------------------------------------|
| Free Text | Open text field (250 alphanumeric characters) |

## 3. First Name

Definition: **First name of patient.**

Data Type: Character String

Table: tbl\_CPCTR.str\_First\_Name

Validation

Rules:

Comments: This field is NOT EXPORTED to the CPCTR. ONLY THE HOST SITE WILL HAVE ACCESS TO THE LINKAGE INFORMATION. Its purpose is to:

- 1) allow each site to index their cases so that they can link back with the de-identified data for follow up and QA purposes.

| Value     | Value Description                             |
|-----------|-----------------------------------------------|
| Free Text | Open text field (250 alphanumeric characters) |

#### 4. Case Identifier\*

Definition: **De-identified ID for each case in the Cooperative Prostate Cancer Tissue Resource.**

Data Type: Character String

Table: tbl\_Case\_Identifiers.str\_Hospital\_Identifier

Validation Site: Confirm that ID is from the assigned ID file. If not,

Rules: reassign and propagate correct ID.

IMS: Compare ID with IMS internal ID file, confirm that ID was assigned to Site.

Comments: 1) IMS will generate unique ID's and distribute to each site. Each site will request more ID's as needed.  
2) THIS IS THE DE-IDENTIFIED ID THAT IS SENT TO THE CENTRAL DATABASE/CPCTR.

| Value                 | Value Description |
|-----------------------|-------------------|
| 10-Digit alphanumeric | Provided by IMS.  |

#### 5. Race\*

Definition: **Needs to have a positive statement in the med records. Discordant documents should result in further record review. If majority of records specify a specific race, that race should be used. MD's notes (OR reports, H&P, etc.) take priority over hospital notes.**

Data Type: Character String

Table: tbl\_CPCTR.str\_2\_Race

Validation

Rules:

Comments: Required CDE. The expected level of unknown cases <10%. We do not want any institution to disqualify more than 20% of their cases on the basis of "required" elements.

| Value            | Value Description                                                                                                               |
|------------------|---------------------------------------------------------------------------------------------------------------------------------|
| African American | Includes the designations of Black, Negro or Afro-American.                                                                     |
| Asian            | Based on birthplace info (i.e. China, Japan, India, or the Philippines) or race reported only as Asian, Oriental, or Mongolian. |
| Caucasian        | White includes Mexican, Puerto Rican, Cuban, and all other Caucasians.                                                          |
| Native American  | Native American                                                                                                                 |
| Pacific Islander | Pacific Islander                                                                                                                |
| Other            | A combination of two or more races OR race not listed above (Specify in Race comment field).                                    |
| Unknown          | Unknown is not known at accessioning                                                                                            |

#### 6. Other Race comments

Definition: **Provide further details on "other" race or general**

**comments on race field.**

Data Type: Character String  
Table: tbl\_CPCTR.str\_16\_Race\_Comment  
Validation  
Rules:  
Comments: Specify all races when 2 or more races are noted.

| Value     | Value Description                             |
|-----------|-----------------------------------------------|
| Free Text | Open text field (250 alphanumeric characters) |

**7. Hispanic Origin**

Definition: **Code whether the patient is of Hispanic decent.**  
Data Type: Character String  
Table: tbl\_CPCTR.str\_3\_Hispanic  
Validation  
Rules:  
Comments: Needs to have a positive statement in the medical records. Do not rely on the spelling of name. Some patients can be identified as African American but still have a Hispanic origin. In this case do we assign Hispanic origin as yes. No documentation of Hispanic origin, conclude patient is not of Hispanic decent (unknown). The ROADS guideline recommends that the registrar may consider the patient of Spanish Origin if only documented by surname only or maiden name and there is no contrary evidence that the person is not Hispanic from the medical record.

| Value   | Value Description                    |
|---------|--------------------------------------|
| Yes     | Yes                                  |
| No      | No                                   |
| Unknown | Unknown is not known at accessioning |

**8. Birth date\***

Definition: **Record patient's date of birth in month and year found on the patient's pathology report, H&P, admitting sheet.**  
Data Type: Integer: MMYYYY  
Table: tbl\_CPCTR.int\_4\_Month\_of\_Birth;  
tbl\_CPCTR.int\_5\_Year\_of\_Birth  
Validation  
Rules:  
Comments: Birth year is a required field.

| Value | Value Description        |
|-------|--------------------------|
| 1-12  | 2-digit month-Month (MM) |
| YYYY  | 4-digit year-Year (YYYY) |

**9. Family History of Prostate Cancer**

Definition: Code whether the patient has a family member with a history of prostate cancer.  
Data Type: Character String



Table: tbl\_CPCTR.str\_8\_Family\_History\_PCA

Validation

Rules:

Comments: Documentation can be found in the H&P. Unknown values should also include cases with inconsistent or discordant information. If no information is found which positively states some family member has cancer should be listed as unknown.

| Value   | Value Description                                                                                                                                  |
|---------|----------------------------------------------------------------------------------------------------------------------------------------------------|
| Yes     | Yes                                                                                                                                                |
| No      | No                                                                                                                                                 |
| Unknown | Unknown is not known at accessioning OR not accessible from usual resources for this information (eg. medical record, registry, chart review, etc) |

### 10. Family History comments

Definition: **Comments related to Family history.**

Data Type: Character String

Table: tbl\_CPCTR.str\_26\_Family\_Comment

Validation

Rules:

Comments:

| Value     | Value Description                             |
|-----------|-----------------------------------------------|
| Free Text | Open text field (250 alphanumeric characters) |

### 11. Date of Diagnosis/Date of biopsy proven cancer\*

Definition: Is the month and year that the primary cancer was histologically confirmed. Gold standard is biopsy date, secondary choices should include biopsy review date, the third choice (not desirable) is the prostatectomy date.

Data Type: Integer: MMYYYY

Table: tbl\_CPCTR.int\_10\_Month\_of\_Diagnosis;  
tbl\_CPCTR.int\_11\_Year\_of\_Diagnosis

Validation 1. Date of Diagnosis must prior or equal to prostatectomy date (rounded to month).

2. Date of diagnosis must be after Birth date

Comments:

| Value | Value Description        |
|-------|--------------------------|
| 1-12  | 2-digit month-Month (MM) |
| YYYY  | 4-digit year-Year (YYYY) |

### 12. General Demographic Comment Field

Definition: **General Comments related to Demographics.**

Data Type: Character String

Table: tbl\_CPCTR.str\_18\_General\_Comment

Validation

Rules:

Comments:

| Value     | Value Description                             |
|-----------|-----------------------------------------------|
| Free Text | Open text field (250 alphanumeric characters) |

## SPECIMEN AVAILABILITY

This section will show the types of specimens available through the Resource.

### 13. Are Prostatectomy specimens available?\*

Definition: **Availability of prostatectomy tissue samples.**

Data Type: Character String

Table: tbl\_CPCTR.str\_Is\_Primary\_Carcinoma\_Tissue\_Available

Validation If "YES", then prostatectomy (paraffin, frozen, or both) block

Rules: matrix must be filled in.

Comments: Will need to keep this for bookkeeping, i.e. when we exhaust tissue from blocks sent out.

| Value   | Value Description |
|---------|-------------------|
| No      | No                |
| Yes     | Yes               |
| Unknown | Unknown           |

### 14. Are Biopsy specimens available?\*

Definition: **Availability of prostate biopsy tissue samples.**

Data Type: Character String

Table: tbl\_CPCTR.str\_Biopsy\_Blocks\_Available

Validation 1) If "Biopsy-only" case, then this value is "YES" and  
Rules: (*Biopsy-Subsequent prostatectomy*) must be "NO".

2) If "YES", then biopsy block matrix must be filled in.

Comments: 1) Will need to keep this for bookkeeping, i.e. when we exhaust tissue from blocks sent out.

2) NOTE: "Biopsy-Only" cases are cases due to advance disease or other reasons that did NOT lead to a prostatectomy.

| Value   | Value Description |
|---------|-------------------|
| No      | No                |
| Yes     | Yes               |
| Unknown | Unknown           |

### 15. Are Regional Lymph Node specimens available?\*

Definition: **Availability of regional lymph node tissue samples.**

Data Type: Character String

Table:

Validation If "YES", then regional lymph node block matrix must be filled  
Rules: in.

Comments: 1) Will need to keep this for bookkeeping, i.e. when we exhaust tissue from blocks sent out.

- 2) *Regional lymph nodes* are of the true pelvis. They are pelvic nodes below the bifurcation of the common iliac arteries and include: Pelvic (NOS), Hypogastric, Obturator, Iliac (internal, external, NOS), and Sacral (lateral, presacral, promontory, NOS) nodes.
- 3) *Distant lymph nodes* are outside the confines of the true pelvis and their involvement constitutes distant metastasis. They can be imaged using ultrasound, computed tomography, magnetic resonance imaging, or lymphangiography, and include: aortic (para-aortic, periaortic, lumbar), common iliac, inguinal, superficial inguinal (femoral), supraclavicular, cervical, scalene, and retroperitoneal (NOS) nodes.
- 4) NOTE: Distant Nodes or Regional Nodes removed after a prostatectomy will be entered into the Metastatic Matrix.

| Value   | Value Description |
|---------|-------------------|
| No      | No                |
| Yes     | Yes               |
| Unknown | Unknown           |

#### 16. Are Metastatic specimens available?\*

Definition: **Availability of metastatic tissue samples.**

Data Type: Character String

Table: tbl\_CPCTR.str\_Are\_Metastatic\_Tissue\_Blocks\_Available

Validation: If "YES", then metastatic tissue block matrix must be filled in.

Rules:

Comments: Will need to keep this for bookkeeping, i.e. when we exhaust tissue from blocks sent out.

| Value   | Value Description |
|---------|-------------------|
| No      | No                |
| Yes     | Yes               |
| Unknown | Unknown           |

#### 17. Are Plasma samples available?\*

Definition: **Availability of plasma samples.**

Data Type: Character String

Table: tbl\_CPCTR.str\_Plasma\_Samples\_Available

Validation:

Rules:

Comments: Will need to keep this for bookkeeping, i.e. when we exhaust tissue from blocks sent out.

| Value   | Value Description |
|---------|-------------------|
| No      | No                |
| Yes     | Yes               |
| Unknown | Unknown           |

#### 18. Are Serum samples available?\*

Definition: **Availability of serum samples.**

Data Type: Character String

Table: tbl\_CPCTR.str\_Serum\_Samples\_Available

Validation

Rules:

Comments: Will need to keep this for bookkeeping, i.e. when we exhaust tissue from blocks sent out.

| Value   | Value Description |
|---------|-------------------|
| No      | No                |
| Yes     | Yes               |
| Unknown | Unknown           |

### 19. Are Red Blood Cells (RBCs) available?\*

Definition: **Availability of red blood cell samples.**

Data Type: Character String

Table: tbl\_CPCTR.str\_RBC\_Samples\_Available

Validation

Rules:

Comments: Will need to keep this for bookkeeping, i.e. when we exhaust tissue from blocks sent out.

| Value   | Value Description |
|---------|-------------------|
| No      | No                |
| Yes     | Yes               |
| Unknown | Unknown           |

### 20. Are Peripheral Blood Mononuclear Cells (PBMCs) available?\*

Definition: **Availability of peripheral blood mononuclear cells.**

Data Type: Character String

Table: tbl\_CPCTR.str\_PBMC\_Samples\_Available

Validation

Rules:

Comments: Will need to keep this for bookkeeping, i.e. when we exhaust tissue from blocks sent out.

| Value   | Value Description |
|---------|-------------------|
| No      | No                |
| Yes     | Yes               |
| Unknown | Unknown           |

## PROSTATIC SPECIFIC ANTIGEN (PSA)

### DIAGNOSTIC PSA:

#### 21. PSA value that prompted Diagnostic Biopsy which showed cancer

Definition: **Reported PSA value that is the closest value prior to the diagnostic biopsy date.**

Data Type: Integer

Table: tbl\_CPCTR.dbl\_12\_PSA\_Diagnostic\_Biopsy

Validation should be immediately prior to the diagnostic biopsy and *only*

Rules: *one value allowed*

Comments: Given the date of diagnosis with a confirmed biopsy, the

diagnostic (pre-biopsy) PSA will be *calculated* as the closest value prior to the diagnostic biopsy date. Add all other (pre/post diagnostic) PSA values in the PSA matrix (see below).

| Value   | Value Description      |
|---------|------------------------|
| Integer | >0; 9999, -1 (unknown) |

## 22. Date of PSA that Prompted Diagnostic Biopsy which showed cancer

Definition: **Date when the diagnostic PSA test was reported.**

Data Type: Integer: MMYYYY

Table: tbl\_CPCTR.int\_14\_PSA\_Month\_that\_Prompted\_Diagnostic\_Biopsy;  
tbl\_CPCTR.int\_15\_PSA\_Year\_that\_Prompted\_Diagnostic\_Biopsy

Validation

Rules: Month must be between 1 and 12. Enter 00 for unknown.

Comments:

| Value    | Value Description                                             |
|----------|---------------------------------------------------------------|
| 1-12, 00 | 2-digit month-Month (MM); 00 is standard fictionalized value. |
| YYYY     | 4-digit year-Year (YYYY); Must enter a valid year.            |

## 23. General comments for Diagnostic PSA:

Definition: **Comments related to the diagnostic PSA value.**

Data Type: Character String

Table:

Validation

Rules:

Comments:

| Value     | Value Description                             |
|-----------|-----------------------------------------------|
| Free Text | Open text field (250 alphanumeric characters) |

## PSA MATRIX: (Items #24-27 are multiple entry fields)

The PSA matrix section will allow the collection of multiple PSA values that are prior to and after the diagnostic PSA value. We can write scripts to separate the pre-biopsy (for biopsy-only cases)/pre-prostatectomy PSAs from the post-biopsy/pre-prostatectomy PSAs to determine the biochemical recurrence. We can also calculate the diagnostic PSA since we know the biopsy date and all the PSA dates, and will identify the date of the PSA just before the biopsy. Thus, the central database will take the PSA and Date, sort by date, and calculate the needed results. This also allows one to enter in dates in any order (if much later you get an old chart with more values).

## 24. PSA below threshold (<0.1)

Definition: **Was the PSA value below threshold level of the test**

**method performed.**

Data Type: Yes/no

Table: tbl\_PSA.yes\_PSA

Validation

Rules:

Comments: In certain older laboratory PSA tests, the threshold of the test might be <0.3.

| Value     | Value Description                                                                                         |
|-----------|-----------------------------------------------------------------------------------------------------------|
| Check box | If box is checked, then the PSA value is below the threshold level of the test, otherwise, value is null. |

**25.PSA value (pre/post diagnostic only)**

Definition: **Collect all PSA values prior to and after the diagnostic PSA value.**

Data Type: Integer

Table: tbl\_PSA.dbl\_PSA

Validation

Enter a positive number for PSA >=0.1. Enter -1 if unknown.

Rules:

Comments:

| Value   | Value Description     |
|---------|-----------------------|
| Integer | >0;9999, -1 (unknown) |

**26.Date of PSA**

Definition: **Date when PSA test was performed.**

Data Type: Integer: MMYYYY

Table: tbl\_PSA.int\_Month;  
tbl\_PSA.int\_Year

Validation

Month must be between 1 and 12. Enter 00 for unknown.

Rules:

Comments:

| Value    | Value Description                                             |
|----------|---------------------------------------------------------------|
| 1-12, 00 | 2-digit month-Month (MM); 00 is standard fictionalized value. |
| YYYY     | 4-digit year-Year (YYYY); Must enter a valid year.            |

**27.General comments for PSA matrix**

Definition: **Comments related to each matrix PSA values.**

Data Type: Character String

Table:

Validation

Rules:

Comments:

| Value     | Value Description                             |
|-----------|-----------------------------------------------|
| Free Text | Open text field (250 alphanumeric characters) |

# ANATOMICAL PATHOLOGY GRADING AND CHARACTERISTICS

## PARAFFIN BLOCK MATRIX: (Items #28-40 are multiple entry fields. Up to 5 blocks preferred)

The Paraffin block matrix section will allow the collection of block details on cases that meet the minimum requirements for inclusion into the Resource.

NOTE: Priorities for entering cases in prostatectomy neoplastic block matrix

- These should assist the teams in picking the highest value blocks for the CPCTR archives.
- Since the matrix can include up to 5 blocks here are the recommendations for selection criteria:
  - 4) The ***first block*** should include the largest nodule of tumor (as specified by the CDE)
  - 5) The ***third through fifth blocks*** should include seminal vesicle invasion, ECE or angiolymphatic invasion (in that order of preference) NOTE: If SV, ECE, AL do not occur, select the next largest area of tumor for 3 to 5 of the matrix.
  - 6) The ***second block*** should include the largest amount of PIN and preferred is an area of PIN that is independent of cancer (if that exists). If the blocks with PIN all also contain cancer that does not exclude them. Try then to pick a block that has the largest amount of PIN.

### 28.Paraffin Block Matrix: Block number\*\*

Definition: **Block number of the block with largest tumor nodule.**

Data Type: Character String

Table: tbl\_Block\_Matrix.str\_MB\_Block\_Number

Validation

Rules:

Comments:

| Value     | Value Description                                                 |
|-----------|-------------------------------------------------------------------|
| Free text | List surgical pathology block # from case (varies by institution) |

### 29.Paraffin Block Matrix: Most Prominent Histological Type of Invasive Cancer \*\*

Definition: **Most prominent histological type present on block.**

Data Type: Character String

Table: tbl\_Block\_Matrix.str\_MB\_Most\_Prominent\_Histologic\_Type\_Invasive\_Cancer

Validation If PIN only, then (*Gleason Grading*) should be blank and (*Presence of*

Rules: *PIN*) should be checked YES.

Comments:

| Value                           | Value Description               |
|---------------------------------|---------------------------------|
| Adenocarcinoma NOS (aka acinar) | Adenocarcinoma NOS (aka acinar) |
| Basal cell carcinoma            | Basal cell carcinoma            |

|                                           |                                           |
|-------------------------------------------|-------------------------------------------|
| Ductal adenocarcinoma                     | Ductal adenocarcinoma                     |
| Lymphoma                                  | Lymphoma                                  |
| Mesenchymal tumor (NOS)                   | Mesenchymal tumor (NOS)                   |
| Mucinous adenocarcinoma                   | Mucinous adenocarcinoma                   |
| Neuroendocrine carcinoma                  | Neuroendocrine carcinoma                  |
| PIN only                                  | PIN only                                  |
| Sarcomatoid carcinoma                     | Sarcomatoid carcinoma                     |
| Signet ring adenocarcinoma                | Signet ring adenocarcinoma                |
| Small cell anaplastic carcinoma           | Small cell anaplastic carcinoma           |
| Squamous or adenosquamous carcinoma       | Squamous or adenosquamous carcinoma       |
| Transitional (not primary)                | Transitional (not primary)                |
| Undifferentiated non-small cell carcinoma | Undifferentiated non-small cell carcinoma |
| Other (specify in comments)               | Other (specify in comments)               |
| Unknown                                   | Unknown                                   |

### 30.Paraffin Block Matrix: Primary Gleason Grade\*\*

Definition: **Primary Gleason grade of block**

Data Type: Character String

Table: tbl\_Block\_Matrix.str\_MB\_Primary\_Gleason\_Grade

Validation If "not adenocarcinoma" then (*Most prominent histological type*)

Rules: must be either basal cell carcinoma, transitional (not primary), undifferentiated non-small cell carcinoma, sarcomatoid carcinoma, neuroendocrine carcinoma, small cell anaplastic carcinoma, squamous or adenosquamous carcinoma, mesenchymal tumor (NOS), lymphoma, other (specify in comments), or unknown.

Comments:

| Value              | Value Description  |
|--------------------|--------------------|
| 1                  | 1                  |
| 2                  | 2                  |
| 3                  | 3                  |
| 4                  | 4                  |
| 5                  | 5                  |
| Not adenocarcinoma | Not adenocarcinoma |
| Not primary tumor  | Not primary tumor  |
| PIN only           | PIN only           |
| Unknown            | Unknown            |

### 31.Paraffin Block Matrix: Secondary Gleason Grade\*\*

Definition: **Secondary Gleason grade of block**

Data Type: Character String

Table: tbl\_Block\_Matrix.str\_MB\_Secondary\_Gleason\_Grade

Validation If "not adenocarcinoma" then (*Most prominent histological type*)

Rules: must be either basal cell carcinoma, transitional (not primary), undifferentiated non-small cell carcinoma, sarcomatoid



carcinoma, neuroendocrine carcinoma, small cell anaplastic carcinoma, squamous or adenosquamous carcinoma, mesenchymal tumor (NOS), lymphoma, other (specify in comments), or unknown.

Comments:

| Value              | Value Description  |
|--------------------|--------------------|
| 1                  | 1                  |
| 2                  | 2                  |
| 3                  | 3                  |
| 4                  | 4                  |
| 5                  | 5                  |
| Not adenocarcinoma | Not adenocarcinoma |
| Not primary tumor  | Not primary tumor  |
| PIN only           | PIN only           |
| Unknown            | Unknown            |

**32.Paraffin Block Matrix: Size of Largest Individual Nodule of Invasive Cancer (in cm)**

Definition: **Size of invasive cancer present in block.**

Data Type: Double (number)

Table: tbl\_Block\_Matrix.dbl\_MB\_Size\_of\_Largest\_Individual\_Nodule

Validation: Enter a positive number. Enter -1 if unknown.

Rules:

Comments:

| Value  | Value Description               |
|--------|---------------------------------|
| Number | -1 Or (>=0 And <100) Or is Null |

**33.Paraffin Block Matrix: Presence of High Grade Prostatic Intraepithelial Neoplasia (PIN)**

Definition: **Presence of High Grade PIN in block.**

Data Type: Yes/No

Table: tbl\_Block\_Matrix.str\_MB\_PIN

Validation:

Rules:

Comments:

| Value     | Value Description                                                     |
|-----------|-----------------------------------------------------------------------|
| Check box | If box is checked, then the PIN value is Yes, otherwise, value is No. |

**34.Paraffin Block Matrix: Presence of Extracapsular Extension (ECE)**  
**Definition: Presence of Extracapsular/Extraprostatic Extension in block.**

Data Type: Yes/No

Table: tbl\_Block\_Matrix.str\_MB\_ECE

Validation:

Rules:

Comments:

| Value     | Value Description                                                     |
|-----------|-----------------------------------------------------------------------|
| Check box | If box is checked, then the ECE value is Yes, otherwise, value is No. |

**35. Paraffin Block Matrix: Presence of Positive Surgical Margin (SM)**

Definition: **Positive surgical margin in block.**

Data Type: Yes/No

Table: tbl\_Block\_Matrix.str\_MB\_SM

Validation

Rules:

Comments:

| Value     | Value Description                                                    |
|-----------|----------------------------------------------------------------------|
| Check box | If box is checked, then the SM value is Yes, otherwise, value is No. |

**36. Paraffin Block Matrix: Presence of Perineural Invasion (PN)**

Definition: **Presence of Perineural Invasion in block.**

Data Type: Yes/No

Table: tbl\_Block\_Matrix.str\_MB\_PN

Validation

Rules:

Comments:

| Value     | Value Description                                                    |
|-----------|----------------------------------------------------------------------|
| Check box | If box is checked, then the PN value is Yes, otherwise, value is No. |

**37. Paraffin Block Matrix: Presence of Seminal Vesicle Invasion (SV)**

Definition: **Presence of Seminal Vesicle Invasion in block.**

Data Type: Yes/No

Table: tbl\_Block\_Matrix.str\_MB\_SV

Validation

Rules:

Comments:

| Value     | Value Description                                                    |
|-----------|----------------------------------------------------------------------|
| Check box | If box is checked, then the SV value is Yes, otherwise, value is No. |

**38. Paraffin Block Matrix: Presence of Angiolymphatic Invasion (AL)**

Definition: **Presence of Angiolymphatic Invasion in block.**

Data Type: Yes/No

Table: tbl\_Block\_Matrix.str\_MB\_AL

Validation

Rules:

Comments:

| Value     | Value Description                                                    |
|-----------|----------------------------------------------------------------------|
| Check box | If box is checked, then the AL value is Yes, otherwise, value is No. |

**39. Paraffin Block Matrix: Type of Block(s) available**

Definition: **Type of block available.**

Data Type: Character String  
 Table: tbl\_Block\_Matrix.str\_MB\_ParFro  
 Validation  
 Rules:  
 Comments:

| Value               | Value Description                                                                          |
|---------------------|--------------------------------------------------------------------------------------------|
| Paraffin only       | If this value is picked, then only paraffin block is available for this matrix.            |
| Frozen only         | If this value is picked, then only frozen block is available for this matrix.              |
| Paraffin and frozen | If this value is picked, then both Paraffin and frozen block is available for this matrix. |

#### 40. Paraffin Block Matrix: block comments

Definition: **Comments related to paraffin block matrix.**  
 Data Type: Character String  
 Table: tbl\_Block\_Matrix.str\_MB\_Comment  
 Validation  
 Rules:  
 Comments:

| Value     | Value Description                             |
|-----------|-----------------------------------------------|
| Free Text | Open text field (250 alphanumeric characters) |

### NON-NEOPLASTIC PARAFFIN BLOCK'S:

**Try to include at least one block of normal prostate if possible (two blocks are preferred). If it is not possible to find a completely normal block then include one with minimal amounts of PIN or carcinoma. Seminal vesical is not considered a good normal block.**

#### 41. Paraffin Prostatectomy Non-Neoplastic Block #1:

Definition: **Block number of non-neoplastic block #1**  
 Data Type: Character String  
 Table: tbl\_CPCTR.str\_155\_Prostatectomy\_Non\_Neoplastic\_Block\_1\_Number  
 Validation  
 Rules:  
 Comments: Should be free of PIN or Cancer if possible. Posterior and lateral lobe sections are preferred.

| Value     | Value Description                                                 |
|-----------|-------------------------------------------------------------------|
| Free Text | List surgical pathology block # from case (varies by institution) |

#### 42. Paraffin Prostatectomy Non-Neoplastic Block #2:

Definition: **Block number of non-neoplastic block #2**  
 Data Type: Character String  
 Table: tbl\_CPCTR.str\_156\_Prostatectomy\_Non\_Neoplastic\_Block\_2\_Number  
 Validation  
 Rules:  
 Comments: Should be free of PIN or Cancer if possible. Posterior and lateral lobe

sections are preferred.

| Value     | Value Description                                                 |
|-----------|-------------------------------------------------------------------|
| Free Text | List surgical pathology block # from case (varies by institution) |

**43. General Comments on Paraffin Blocks:**

Definition: **General comments related to all paraffin blocks.**  
 Data Type: Character String  
 Table: tbl\_CPCTR.str\_20\_Matrix\_Comment  
 Validation  
 Rules:  
 Comments:

| Value     | Value Description                             |
|-----------|-----------------------------------------------|
| Free Text | Open text field (250 alphanumeric characters) |

**FROZEN BLOCK MATRIX: (Items #44-56 are multiple entry fields. Up to 5 blocks preferred)**

**NOTE: This section is for the FROZEN BLOCK matrix.**  
 It is very possible that some (and occasionally all) of the frozen blocks in the matrix will also have paraffin tissue. When this happens indicate this in data element [Type of Block(s) available]. On occasion, there may be some blocks that are only frozen (site dependent) also indicate this in the aforementioned data items.

The Frozen block matrix section will allow the collection of block details on cases that meet the minimum requirements for inclusion into the Resource.

**NOTE: Priorities for entering cases in prostatectomy neoplastic block matrix**

- These should assist the teams in picking the highest value blocks for the CPCTR archives.
- Since the matrix can include up to 5 blocks here are the recommendations for selection criteria:
  - 1) The ***first block*** should include the largest nodule of tumor (as specified by the CDE)
  - 2) The ***third through fifth blocks*** should include seminal vesicle invasion, ECE or angiolymphatic invasion (in that order of preference) **NOTE: If SV, ECE, AL do not occur, select the next largest area of tumor for 3 to 5 of the matrix.**
  - 3) The ***second block*** should include the largest amount of PIN and preferred is an area of PIN that is independent of cancer (if that exists). If the blocks with PIN all also contain cancer that does not exclude them. Try then to pick a block that has the largest amount of PIN.

#### 44. Frozen Block Matrix: Block number

Definition: **Block number of the block with largest tumor nodule.**

Data Type: Character String

Table: tbl\_Frozen\_Matrix.str\_FM\_Block\_Number

Validation

Rules:

Comments:

| Value     | Value Description                                                 |
|-----------|-------------------------------------------------------------------|
| Free text | List surgical pathology block # from case (varies by institution) |

#### 45. Frozen Block Matrix: Most Prominent Histological Type of Invasive Cancer

Definition: **Most prominent histological type present on block.**

Data Type: Character String

Table: tbl\_Frozen\_Matrix.str\_FM\_Most\_Prominent\_Histologic\_Type\_Invasive\_Cancer

Validation If PIN only, then (*Gleason Grading*) should be blank and (*Presence of*

Rules: *PIN*) should be checked YES.

Comments:

| Value                                     | Value Description                         |
|-------------------------------------------|-------------------------------------------|
| Adenocarcinoma NOS (aka acinar)           | Adenocarcinoma NOS (aka acinar)           |
| Basal cell carcinoma                      | Basal cell carcinoma                      |
| Ductal adenocarcinoma                     | Ductal adenocarcinoma                     |
| Lymphoma                                  | Lymphoma                                  |
| Mesenchymal tumor (NOS)                   | Mesenchymal tumor (NOS)                   |
| Mucinous adenocarcinoma                   | Mucinous adenocarcinoma                   |
| Neuroendocrine carcinoma                  | Neuroendocrine carcinoma                  |
| PIN only                                  | PIN only                                  |
| Sarcomatoid carcinoma                     | Sarcomatoid carcinoma                     |
| Signet ring adenocarcinoma                | Signet ring adenocarcinoma                |
| Small cell anaplastic carcinoma           | Small cell anaplastic carcinoma           |
| Squamous or adenosquamous carcinoma       | Squamous or adenosquamous carcinoma       |
| Transitional (not primary)                | Transitional (not primary)                |
| Undifferentiated non-small cell carcinoma | Undifferentiated non-small cell carcinoma |
| Other (specify in comments)               | Other (specify in comments)               |
| Unknown                                   | Unknown                                   |

#### 46. Frozen Block Matrix: Primary Gleason Grade

Definition: **Primary Gleason grade of block**

Data Type: Character String

Table: tbl\_Frozen\_Matrix.str\_FM\_Primary\_Gleason\_Grade

Validation If "not adenocarcinoma" then (*Most prominent histological type*)

Rules: must be either basal cell carcinoma, transitional (not primary), undifferentiated non-small cell carcinoma, sarcomatoid carcinoma, neuroendocrine carcinoma, small cell anaplastic carcinoma, squamous or adenosquamous carcinoma, mesenchymal tumor (NOS), lymphoma, other (specify in

comments), or unknown.

Comments:

| Value              | Value Description  |
|--------------------|--------------------|
| 1                  | 1                  |
| 2                  | 2                  |
| 3                  | 3                  |
| 4                  | 4                  |
| 5                  | 5                  |
| Not adenocarcinoma | Not adenocarcinoma |
| Not primary tumor  | Not primary tumor  |
| PIN only           | PIN only           |
| Unknown            | Unknown            |

#### 47.Frozen Block Matrix: Secondary Gleason Grade

Definition: **Secondary Gleason grade of block**

Data Type: Character String

Table: tbl\_Frozen\_Matrix.str\_FM\_Secondary\_Gleason\_Grade

Validation If "not adenocarcinoma" then (*Most prominent histological type*)

Rules: must be either basal cell carcinoma, transitional (not primary), undifferentiated non-small cell carcinoma, sarcomatoid carcinoma, neuroendocrine carcinoma, small cell anaplastic carcinoma, squamous or adenosquamous carcinoma, mesenchymal tumor (NOS), lymphoma, other (specify in comments), or unknown.

Comments:

| Value              | Value Description  |
|--------------------|--------------------|
| 1                  | 1                  |
| 2                  | 2                  |
| 3                  | 3                  |
| 4                  | 4                  |
| 5                  | 5                  |
| Not adenocarcinoma | Not adenocarcinoma |
| Not primary tumor  | Not primary tumor  |
| PIN only           | PIN only           |
| Unknown            | Unknown            |

#### 48.Frozen Block Matrix: Size of Largest Individual Nodule of Invasive Cancer (in cm)

Definition: **Size of invasive cancer present in block.**

Data Type: Double (number)

Table: tbl\_Frozen\_Matrix.dbl\_FM\_Size\_of\_Largest\_Individual\_Nodule

Validation Enter a positive number. Enter -1 if unknown.

Rules:

Comments:

| Value | Value Description |
|-------|-------------------|
|-------|-------------------|

|        |                                 |
|--------|---------------------------------|
| Number | -1 Or (>=0 And <100) Or is Null |
|--------|---------------------------------|

**49.Frozen Block Matrix: Presence of High Grade Prostatic Intraepithelial Neoplasia (PIN)**

Definition: **Presence of High Grade PIN in block.**

Data Type: Yes/No

Table: tbl\_Frozen\_Matrix.str\_FM\_PIN

Validation

Rules:

Comments:

| Value     | Value Description                                                     |
|-----------|-----------------------------------------------------------------------|
| Check box | If box is checked, then the PIN value is Yes, otherwise, value is No. |

**50.Frozen Block Matrix: Presence of Extracapsular Extension (ECE)**

Definition: **Presence of Extracapsular/Extraprostatic Extension in block.**

Data Type: Yes/No

Table: tbl\_Frozen\_Matrix.str\_FM\_ECE

Validation

Rules:

Comments:

| Value     | Value Description                                                     |
|-----------|-----------------------------------------------------------------------|
| Check box | If box is checked, then the ECE value is Yes, otherwise, value is No. |

**51.Frozen Block Matrix: Presence of Positive Surgical Margin (SM)**

Definition: **Positive surgical margin in block.**

Data Type: Yes/No

Table: tbl\_Frozen\_Matrix.str\_FM\_SM

Validation

Rules:

Comments:

| Value     | Value Description                                                    |
|-----------|----------------------------------------------------------------------|
| Check box | If box is checked, then the SM value is Yes, otherwise, value is No. |

**52.Frozen Block Matrix: Presence of Perineural Invasion (PN)**

Definition: **Presence of Perineural Invasion in block.**

Data Type: Yes/No

Table: tbl\_Frozen\_Matrix.str\_FM\_PN

Validation

Rules:

Comments:

| Value     | Value Description                                                    |
|-----------|----------------------------------------------------------------------|
| Check box | If box is checked, then the PN value is Yes, otherwise, value is No. |

### 53. Frozen Block Matrix: Presence of Seminal Vesicle Invasion (SV)

Definition: **Presence of Seminal Vesicle Invasion in block.**

Data Type: Yes/No

Table: tbl\_Frozen\_Matrix.str\_FM\_SV

Validation

Rules:

Comments:

| Value     | Value Description                                                    |
|-----------|----------------------------------------------------------------------|
| Check box | If box is checked, then the SV value is Yes, otherwise, value is No. |

### 54. Frozen Block Matrix: Presence of Angiolymphatic Invasion (AL)

Definition: **Presence of Angiolymphatic Invasion in block.**

Data Type: Yes/No

Table: tbl\_Frozen\_Matrix.str\_FM\_AL

Validation

Rules:

Comments:

| Value     | Value Description                                                    |
|-----------|----------------------------------------------------------------------|
| Check box | If box is checked, then the AL value is Yes, otherwise, value is No. |

### 55. Frozen Block Matrix: Type of Block(s) available

Definition: **Type of block available.**

Data Type: Character String

Table: tbl\_Frozen\_Matrix.str\_FM\_ParFro

Validation

Rules:

Comments:

| Value               | Value Description                                                                          |
|---------------------|--------------------------------------------------------------------------------------------|
| Paraffin only       | If this value is picked, then only paraffin block is available for this matrix.            |
| Frozen only         | If this value is picked, then only frozen block is available for this matrix.              |
| Paraffin and frozen | If this value is picked, then both Paraffin and frozen block is available for this matrix. |

### 56. Frozen Block Matrix: block comments

Definition: **Comments related to frozen block matrix.**



Data Type: Character String  
 Table: tbl\_Frozen\_Matrix.str\_FM\_Comment  
 Validation  
 Rules:  
 Comments:

| Value     | Value Description                             |
|-----------|-----------------------------------------------|
| Free Text | Open text field (250 alphanumeric characters) |

## NON-NEOPLASTIC FROZEN BLOCK'S:

Try to include at least one block of normal prostate if possible (two blocks are preferred). If it is not possible to find a completely normal block then include one with minimal amounts of PIN or carcinoma. Seminal vesical is not considered a good normal block.

### 57.Frozen Prostatectomy Non-Neoplastic Block #1:

Definition: **Block number of non-neoplastic block #1**  
 Data Type: Character String  
 Table: tbl\_CPCTR.str\_Prostatectomy\_Frozen\_Non\_Neoplastic\_Block\_1\_Number  
 Validation  
 Rules:  
 Comments: Should be free of PIN or Cancer if possible. Posterior and lateral lobe sections are preferred.

| Value     | Value Description                                                 |
|-----------|-------------------------------------------------------------------|
| Free Text | List surgical pathology block # from case (varies by institution) |

### 58.Frozen Prostatectomy Non-Neoplastic Block #2:

Definition: **Block number of non-neoplastic block #2**  
 Data Type: Character String  
 Table: tbl\_CPCTR.str\_Prostatectomy\_Frozen\_Non\_Neoplastic\_Block\_2\_Number  
 Validation  
 Rules:  
 Comments: Should be free of PIN or Cancer if possible. Posterior and lateral lobe sections are preferred.

| Value     | Value Description                                                 |
|-----------|-------------------------------------------------------------------|
| Free Text | List surgical pathology block # from case (varies by institution) |

### 59.Frozen Tissue: Warm Ischemic Time (in minutes)

Definition: **Turn around time of when tissue was removed from the patient and the time when it was banked.**  
 Data Type: Double (number)  
 Table: tbl\_CPCTR.dbl\_Frozen\_Tissue\_Time  
 Validation  
 Rules:  
 Comments:

| Value  | Value Description    |
|--------|----------------------|
| Number | >0; 99, -1 (unknown) |

### 60. General Comments on Frozen Blocks:

Definition: **General comments related to all frozen blocks.**

Data Type: Character String

Table: tbl\_CPCTR.str\_Frozen\_Tissue\_Comment

Validation

Rules:

Comments:

| Value     | Value Description                             |
|-----------|-----------------------------------------------|
| Free Text | Open text field (250 alphanumeric characters) |

## HISTOLOGICAL CHARACTERISTICS OF PROSTATECTOMY

Enter the overall characteristics of the prostatectomy.

### 61. Date of Prostatectomy\*\*

Definition: **Record patient's date of prostatectomy in month and year found on the patient's pathology report, H&P, admitting sheet. It can also include the date of cystoprostatectomy.**

Data Type: Integer: MMYYYY

Table: tbl\_CPCTR.int\_160\_Month\_of\_Prostatectomy;

tbl\_CPCTR.int\_161\_Year\_of\_Prostatectomy

Validation Date of prostatectomy must be after the diagnostic PSA date,

Rules: the diagnostic biopsy date and birth date.

Value should be after or equal to date of diagnosis.

Comments: Prostatectomy year is a required field.

| Value    | Value Description                                             |
|----------|---------------------------------------------------------------|
| 1-12, 00 | 2-digit month-Month (MM); 00 is standard fictionalized value. |
| YYYY     | 4-digit year-Year (YYYY); Must enter a valid year.            |

### 62. Is Residual Carcinoma Present at Prostatectomy? \*\*

Definition: **Is cancer or High-grade PIN available for this case? Donor cases can also be entered here.**

Data Type: Character String

Table: tbl\_CPCTR.str\_162\_Residual\_Carcinoma

Validation

Rules:

Comments: Will need to keep this for bookkeeping, i.e. when we exhaust tissue from blocks sent out.

| Value      | Value Description                                                          |
|------------|----------------------------------------------------------------------------|
| HGPIN only | HGPIN only                                                                 |
| No         | Answer NO for prostatectomy done because of BPH or other benign condition. |
| Yes        | Yes                                                                        |

|         |         |
|---------|---------|
| Donor   | Donor   |
| Unknown | Unknown |

### 63.Lobe Laterality

Definition: **Prostate lobe origin of this primary prostate cancer.**

Data Type: Character String

Table: tbl\_CPCTR.str\_164\_Lobe\_Laterality

Validation If either one Left, one Right, or one unspecified then pT2b

Rules: cannot be chosen; If Two chosen, then pT2a cannot be chosen.

Comments:

| Value           | Value Description |
|-----------------|-------------------|
| One left        | One left          |
| One right       | One right         |
| One unspecified | One unspecified   |
| Two             | Two               |

### 64.Most Prominent Histological Type of Invasive Cancer\*\*

Definition: **Most prominent overall histological type present in the prostatectomy.**

Data Type: Character String

Table: tbl\_CPCTR.str\_165\_Most\_Prominent\_Histologic\_Type

Validation If PIN only, then (*Gleason Grading*) should be "PIN only" and (*High Grade*

Rules: *PIN*) cannot be "no" or "unknown".

Comments: This is a required CDE.

| Value                                     | Value Description                         |
|-------------------------------------------|-------------------------------------------|
| Adenocarcinoma NOS (aka acinar)           | Adenocarcinoma NOS (aka acinar)           |
| Basal cell carcinoma                      | Basal cell carcinoma                      |
| Ductal adenocarcinoma                     | Ductal adenocarcinoma                     |
| Lymphoma                                  | Lymphoma                                  |
| Mesenchymal tumor (NOS)                   | Mesenchymal tumor (NOS)                   |
| Mucinous adenocarcinoma                   | Mucinous adenocarcinoma                   |
| Neuroendocrine carcinoma                  | Neuroendocrine carcinoma                  |
| PIN only                                  | PIN only                                  |
| Sarcomatoid carcinoma                     | Sarcomatoid carcinoma                     |
| Signet ring adenocarcinoma                | Signet ring adenocarcinoma                |
| Small cell anaplastic carcinoma           | Small cell anaplastic carcinoma           |
| Squamous or adenosquamous carcinoma       | Squamous or adenosquamous carcinoma       |
| Transitional (not primary)                | Transitional (not primary)                |
| Undifferentiated non-small cell carcinoma | Undifferentiated non-small cell carcinoma |
| Other (specify in comments)               | Other (specify in comments)               |
| Unknown                                   | Unknown                                   |

### 65.2<sup>nd</sup> Most Prominent Histological Type of Invasive Cancer

Definition: **2<sup>nd</sup> Most prominent overall histological type present in the prostatectomy.**

Data Type: Character String

Table: tbl\_CPCTR.str\_166\_2nd\_Most\_Prominent\_Histologic\_Type  
 Validation If PIN only, then (*Gleason Grading*) should be "PIN only" and (*High Grade*)  
 Rules: *PIN* cannot be "no" or "unknown".  
 Comments:

| Value                                     | Value Description                         |
|-------------------------------------------|-------------------------------------------|
| Adenocarcinoma NOS (aka acinar)           | Adenocarcinoma NOS (aka acinar)           |
| Basal cell carcinoma                      | Basal cell carcinoma                      |
| Ductal adenocarcinoma                     | Ductal adenocarcinoma                     |
| Lymphoma                                  | Lymphoma                                  |
| Mesenchymal tumor (NOS)                   | Mesenchymal tumor (NOS)                   |
| Mucinous adenocarcinoma                   | Mucinous adenocarcinoma                   |
| Neuroendocrine carcinoma                  | Neuroendocrine carcinoma                  |
| PIN only                                  | PIN only                                  |
| Sarcomatoid carcinoma                     | Sarcomatoid carcinoma                     |
| Signet ring adenocarcinoma                | Signet ring adenocarcinoma                |
| Small cell anaplastic carcinoma           | Small cell anaplastic carcinoma           |
| Squamous or adenosquamous carcinoma       | Squamous or adenosquamous carcinoma       |
| Transitional (not primary)                | Transitional (not primary)                |
| Undifferentiated non-small cell carcinoma | Undifferentiated non-small cell carcinoma |
| Other (specify in comments)               | Other (specify in comments)               |
| Unknown                                   | Unknown                                   |

#### 66.Prostatectomy: Primary Gleason Grade\*\*

Definition: **Primary Gleason grade of prostatectomy.**  
 Data Type: Character String  
 Table: tbl\_CPCTR.str\_167\_Gleason\_Primary\_Grade  
 Validation If "not adenocarcinoma" then (*Most prominent histological type*)  
 Rules: must be either basal cell carcinoma, transitional (not primary), undifferentiated non-small cell carcinoma, sarcomatoid carcinoma, neuroendocrine carcinoma, small cell anaplastic carcinoma, squamous or adenosquamous carcinoma, mesenchymal tumor (NOS), lymphoma, other (specify in comments), or unknown.

Comments:

| Value              | Value Description  |
|--------------------|--------------------|
| 1                  | 1                  |
| 2                  | 2                  |
| 3                  | 3                  |
| 4                  | 4                  |
| 5                  | 5                  |
| Not adenocarcinoma | Not adenocarcinoma |
| Not primary tumor  | Not primary tumor  |
| PIN only           | PIN only           |
| Unknown            | Unknown            |

#### 67.Prostatectomy: Secondary Gleason Grade\*\*

Definition: **Secondary Gleason grade of prostatectomy.**

Data Type: Character String  
 Table: tbl\_CPCTR.str\_168\_Gleason\_Secondary\_Grade  
 Validation If "not adenocarcinoma" then (*Most prominent histological type*)  
 Rules: must be either basal cell carcinoma, transitional (not primary), undifferentiated non-small cell carcinoma, sarcomatoid carcinoma, neuroendocrine carcinoma, small cell anaplastic carcinoma, squamous or adenosquamous carcinoma, mesenchymal tumor (NOS), lymphoma, other (specify in comments), or unknown.

Comments:

| Value              | Value Description  |
|--------------------|--------------------|
| 1                  | 1                  |
| 2                  | 2                  |
| 3                  | 3                  |
| 4                  | 4                  |
| 5                  | 5                  |
| Not adenocarcinoma | Not adenocarcinoma |
| Not primary tumor  | Not primary tumor  |
| PIN only           | PIN only           |
| Unknown            | Unknown            |

### 68.Prostatectomy: Gleason Sum Score\*\*

Definition: **Gleason sum score of prostatectomy.**

Data Type: Character String

Table: tbl\_CPCTR.str\_169\_Gleason\_Sum\_Score

Validation 1) If "not adenocarcinoma" then (*Most prominent histological type*) must be either basal cell carcinoma, transitional (not primary), undifferentiated non-small cell carcinoma, sarcomatoid carcinoma, neuroendocrine carcinoma, small cell anaplastic carcinoma, squamous or adenosquamous carcinoma, mesenchymal tumor (NOS), lymphoma, other (specify in comments), or unknown.  
 2) If Gleason Sum is 6 or 7 must answer "*Prostatectomy-Percentage of Gleason 4/5 grade (in all of 6's and 7's)*".  
 3) Sum of character values in (*Prostatectomy-Primary Gleason*) and (*Prostatectomy-Secondary Gleason*) must equal sum of value in (*Prostatectomy-Gleason Sum*).

Comments:

| Value | Value Description |
|-------|-------------------|
| 2     | 2                 |
| 3     | 3                 |
| 4     | 4                 |
| 5     | 5                 |
| 6     | 6                 |
| 7     | 7                 |
| 8     | 8                 |
| 9     | 9                 |

|                    |                    |
|--------------------|--------------------|
| 10                 | 10                 |
| Not adenocarcinoma | Not adenocarcinoma |
| Not primary tumor  | Not primary tumor  |
| PIN only           | PIN only           |
| Unknown            | Unknown            |

### 69. Percentage of Gleason 4/5 grade (in all of 6's and 7's)

Definition: **Percentage of Gleason 4/5 Grade present in the prostatectomy with Gleason sum score of 6 and 7. Underscores prognostic significance of tiny component of Gleason 4 and 5 tumor in Gleason 6 and 7 tumors.**

Data Type: Integer (number)

Table: tbl\_CPCTR.int\_170\_Percentage\_Gleason

Validation If (*Prostatectomy-Percentage Gleason 4/5*) is filled in as greater than 10,

- Rules:
- 1) then (*Prostatectomy-Gleason Sum*) must have a character value of 6 or 7.
  - 2) And character value in either (*Prostatectomy-Primary Gleason*) and (*Prostatectomy-Secondary Gleason*) or both must include a "Gleason score 4" or a "Gleason score 5" (i.e. choices are 4,4; 4,5; 5,5; 5,4)

Comments:

| Value       | Value Description                |
|-------------|----------------------------------|
| Integer (%) | -1 Or (>=0 And <=100) Or is Null |

### 70. Size of Largest Individual Nodule of Invasive Cancer (in cm)

Definition: **Size of largest individual nodule of invasive cancer present in the prostatectomy.**

Data Type: Double (number)

Table: tbl\_CPCTR.dbl\_171\_Size\_of\_Largest\_individual\_Nodule

Validation 1) Enter a positive number. Enter -1 if unknown.

Rules: 2) Size may be unknown (-1) only if pathologic T Stage is known (not "TX"), or if pathologic M Stage is "M1".

Comments:

| Value  | Value Description               |
|--------|---------------------------------|
| Number | -1 Or (>=0 And <100) Or is Null |

### 71. Percentage of Gland Occupied by Tumor

Definition: **Percentage of Gland Occupied by Tumor in the prostatectomy.**

Data Type: Character String

Table: tbl\_CPCTR.str\_172\_Percentage\_Gland\_Occupied\_by\_Tumor

Validation Value (~Volume) may be unknown (-1) only if pathologic T

Rules: Stage is known (not "TX"), or if pathologic M Stage is "M1".

Comments:

| Value | Value Description |
|-------|-------------------|
|-------|-------------------|

|          |          |
|----------|----------|
| <5%      | <5%      |
| 5 to 25% | 5 to 25% |
| >25%     | >25%     |
| Unknown  | Unknown  |

### 72.Multifocal Disease

Definition: **Multifocal tumors MUST be separated by a certain distance (1-2 cm) so that the chance of artifactual sectioning is eliminated. The INDEX tumor is the primary case and the size is determined from that tumor.**

Data Type: Character String

Table: tbl\_CPCTR.str\_175\_Multifocal\_Disease

Validation

Rules:

Comments:

| Value   | Value Description |
|---------|-------------------|
| No      | No                |
| Yes     | Yes               |
| Unknown | Unknown           |

### 73.Presence of High Grade Prostatic Intraepithelial Neoplasia

Definition: **Is High Grade Prostatic Intraepithelial Neoplasia present in the prostatectomy?**

Data Type: Character String

Table: tbl\_CPCTR.str\_176\_High\_Grade\_Prostatic\_Intraepithelial\_Neoplasia\_Present

Validation

Rules:

Comments:

| Value                                   | Value Description                       |
|-----------------------------------------|-----------------------------------------|
| No                                      | No                                      |
| Unknown                                 | Unknown                                 |
| Yes-focality unknown                    | Yes-focality unknown                    |
| Yes-multifocal                          | Yes-multifocal                          |
| Yes-one or two foci away from the tumor | Yes-one or two foci away from the tumor |
| Yes-one or two foci in region of tumor  | Yes-one or two foci in region of tumor  |

### 74.Extraprostatic Extension/Extracapsular Invasion

Definition: **Extraprostatic or Extracapsular extension seen in prostatectomy. Focal Extracapsular extension is defined as less than 0.8mm of ECE and established is >0.8mm. Multifocal is greater than 2 different foci of ECE.**

Data Type: Character String

Table: tbl\_CPCTR.str\_173\_Extraprostatic extension/extracapsular invasion

Validation: If ECE is present in block matrix (paraffin or frozen), then this value must

Rules: = Focal, Multifocal, or Established.

Comments:

| Value       | Value Description                          |
|-------------|--------------------------------------------|
| Established | Established (>0.8mm)                       |
| Focal       | Focal (less than 0.8mm)                    |
| Multifocal  | Multifocal (greater than 2 different foci) |
| None        | None                                       |
| Unknown     | Unknown                                    |

### 75.Surgical Margin Involvement

Definition: **Are Surgical Margins involved by Tumor (ink on margin)?**

Data Type: Character String

Table: tbl\_CPCTR.str\_174\_Surgical\_Margins

Validation If SM is present in block matrix (paraffin or frozen), then this value

Rules: must = Focal or Widespread.

Comments:

| Value                                  | Value Description                      |
|----------------------------------------|----------------------------------------|
| All surgical margins are free of tumor | All surgical margins are free of tumor |
| Tumor focal at margin                  | Tumor focal at margin                  |
| Tumor widespread at margin             | Tumor widespread at margin             |
| Unknown                                | Unknown                                |

### 76.Presence of Perineural Invasion

Definition: **Is Perineural Invasion present in the prostatectomy?**

Data Type: Character String

Table: tbl\_CPCTR.str\_177\_Perineural\_Invasion\_Present

Validation If PN is present in block matrix (paraffin or frozen), then this value =

Rules: Yes.

Comments:

| Value   | Value Description |
|---------|-------------------|
| No      | No                |
| Yes     | Yes               |
| Unknown | Unknown           |

### 77.Presence of Seminal Vesicle Invasion

Definition: **Presence of seminal vesical involvement in the prostatectomy.**

Data Type: Character String

Table: tbl\_CPCTR.str\_178\_Seminal\_Vesicle\_Invasion\_Present

Validation If SV is present in block matrix (paraffin or frozen), then this value =

Rules: Yes.

Comments:

| Value   | Value Description |
|---------|-------------------|
| No      | No                |
| Yes     | Yes               |
| Unknown | Unknown           |



### 78. Presence of Angiolymphatic Invasion

Definition: **Is Angio/Lymphatic Invasion present in the prostatectomy?**

Data Type: Character String

Table: tbl\_CPCTR.str\_179\_Angio\_Lymphatic\_Invasion\_Present

Validation If AL is present in block matrix (paraffin or frozen), then this value =

Rules: Yes.

Comments:

| Value   | Value Description |
|---------|-------------------|
| No      | No                |
| Yes     | Yes               |
| Unknown | Unknown           |

### 79. General Comments Section for Prostatectomy:

Definition: **General comments related to prostatectomy.**

Data Type: Character String

Table: tbl\_CPCTR.str\_182\_Comment\_for\_Prostatectomy

Validation

Rules:

Comments: To provide general comments on the entire prostatectomy.

| Value     | Value Description                             |
|-----------|-----------------------------------------------|
| Free Text | Open text field (250 alphanumeric characters) |

## REGIONAL LYMPH NODE STATUS AT THE TIME OF PROSTATECTOMY

Include the lymph node status at the time of the prostatectomy.

-If there is regional lymph node exploration prior or equal to the prostatectomy date, but after the initial diagnostic biopsy, then enter values here (in the Lymph Node section).

-Regional lymph nodes removed after the prostatectomy or Distant lymph nodes should be enter in the *METASTASIS MATRIX* section.

NOTE:

Regional lymph nodes are of the true pelvis. They are pelvic nodes below the bifurcation of the common iliac arteries and include: Pelvic (NOS), Hypogastric, Obturator, Iliac (internal, external, NOS), and Sacral (lateral, presacral, promontory, NOS) nodes.

Distant lymph nodes are outside the confines of the true pelvis and their involvement constitutes distant metastasis. They can be imaged using ultrasound, computed tomography, magnetic resonance imaging, or lymphangiography, and include: aortic (para-aortic, periaortic, lumbar), common iliac, inguinal, superficial inguinal (femoral), supraclavicular, cervical, scalene, and retroperitoneal (NOS) nodes.

### 80. Date of Regional Lymph Node resection

Definition: **Record patient's date of regional lymph node resection**

**month and year found on the patient's pathology report, H&P, admitting sheet.**

Data Type: Integer: MMYYYY  
 Table: tbl\_CPCTR.int\_202\_Month\_of\_Lymph\_Node\_Resection;  
 tbl\_CPCTR.int\_203\_Year\_of\_Lymph\_Node\_Resection  
 Validation Value should be after or equal to (*date of diagnosis*) and Value  
 Rules: should be before or equal to (*date of prostatectomy*).  
 Comments:

| Value    | Value Description                                             |
|----------|---------------------------------------------------------------|
| 1-12, 00 | 2-digit month-Month (MM); 00 is standard fictionalized value. |
| YYYY     | 4-digit year-Year (YYYY); Must enter a valid year.            |

**81.Nodes Examined\*\***

Definition: **Number of lymph nodes examined at the time of the prostatectomy.**

Data Type: Integer (number)  
 Table: tbl\_CPCTR.int\_200\_Nodes\_Examined  
 Validation 1) If > 0, then (*Nodes Positive*) must be >= 0 and  
 Rules: (*pathologic N Stage*) must be specified.  
 2) If "-1", then (*Nodes Positive*) must be "-1" and  
 (*pathologic N Stage*) must be "NX".  
 Comments: 1) NOTE: -1 = "nodes examined, but number unknown"  
 2) If no nodes are examined or do not know if any were examined, then enter "0".

| Value   | Value Description               |
|---------|---------------------------------|
| Integer | -1 Or (>=0 And <=99) Or Is Null |

**82.Nodes Positive\*\***

Definition: **Number of positive lymph nodes examined at the time of the prostatectomy.**

Data Type: Integer (number)  
 Table: tbl\_CPCTR.int\_201\_Nodes\_Positive  
 Validation 1) If "0", then (*Nodes Examined*) must be >0, and  
 Rules: (*pathologic N Stage*) must be "N0".  
 2) If > 0, then (*Nodes Examined*) must be > 0, and  
 (*pathologic N Stage*) must be "N1".  
 3) If "-1", then (*Nodes Examined*) must be > 0 or = -1  
 and (*pathologic N Stage*) must be "NX".  
 Comments: 1) NOTE: -1 = "some nodes are positive, but number unknown"  
 2) If no nodes are positive or do not know if any were positive, then enter "0".

| Value   | Value Description               |
|---------|---------------------------------|
| Integer | -1 Or (>=0 And <=99) Or Is Null |

**83.Lymph Node Non-Neoplastic Block #1:**

Definition: **Block number of non-neoplastic block #1**  
 Data Type: Character String  
 Table: tbl\_CPCTR.str\_Lymph\_Node\_Nonneoplastic\_Block  
 Validation  
 Rules:  
 Comments:

| Value     | Value Description                                                 |
|-----------|-------------------------------------------------------------------|
| Free Text | List surgical pathology block # from case (varies by institution) |

**84. General Comments Section for Lymph Nodes:**

Definition: **General comments related to prostatectomy.**  
 Data Type: Character String  
 Table: tbl\_CPCTR.str\_23\_Lymph\_Comment  
 Validation  
 Rules:  
 Comments: To provide general comments on the lymph nodes removed at the time of prostatectomy.

| Value     | Value Description                             |
|-----------|-----------------------------------------------|
| Free Text | Open text field (250 alphanumeric characters) |

**REGIONAL LYMPH NODE BLOCK MATRIX: (Items #85-87 are multiple entry fields. Up to 3 blocks preferred)**

**NOTE: This section is for the LYMPH NODE BLOCK matrix. Only positive lymph nodes found at the time of the prostatectomy should be entered into the matrix. Lymph nodes removed at later dates should be entered in the METASTASIS BLOCK MATRIX.**

**85. Lymph Node Block Matrix: Neoplastic Block number:**

Definition: **Block number of metastatic lymph node block**  
 Data Type: Character String  
 Table: tbl\_Lymph\_Node\_Matrix.str\_LNMB\_Block\_Number  
 Validation  
 Rules:  
 Comments: Must be at the time of prostatectomy or Lymph nodes removed at later dates should be entered in the METASTASIS BLOCK MATRIX.

| Value     | Value Description                                                 |
|-----------|-------------------------------------------------------------------|
| Free Text | List surgical pathology block # from case (varies by institution) |

**86. Lymph Node Block Matrix: Size of Largest Individual Nodule of Invasive Cancer (in cm)**

Definition: **Size of invasive cancer present in lymph node block.**

Data Type: Double (number)  
 Table: tbl\_Lymph\_Node\_Matrix.dbl\_LNMB\_Size\_of\_Largest\_Individual\_ Nodule  
 Validation  
 Rules: Enter a positive number. Enter -1 if unknown.  
 Comments:

| Value  | Value Description               |
|--------|---------------------------------|
| Number | -1 Or (>=0 And <100) Or is Null |

### 87.Lymph Node Block Matrix: Presence of Extracapsular Extension (ECE)

Definition: **Presence of Extracapsular Extension in block.**

Data Type: Yes/No

Table: tbl\_Lymph\_Node\_Matrix.str\_LNMB\_ECE

Validation

Rules:

Comments: Capsule of Lymph Node

| Value     | Value Description                                                     |
|-----------|-----------------------------------------------------------------------|
| Check box | If box is checked, then the ECE value is Yes, otherwise, value is No. |

## RECURRENCE/METASTASIS STATUS:

The Recurrence/Metastasis Status data elements are separated into three categories:

- 1) **Biochemical recurrence** calls using the PSA recurrence algorithm developed by the CPCTR.
- 2) **Clinically verified Tissue recurrence/metastasis** for cases, which do not have blocks available for the Resource.
- 3) **Metastatic Tissue block matrix** for cases that have tissue available through the Resource from anatomical sites that show recurrence/metastasis of prostate cancer.

### BIOCHEMICAL RECURRENCE: (calculated values)

The biochemical recurrence calls are made using the PSA recurrence algorithm developed by the CPCTR. Further details on the algorithm used can be received by contacting the Resource.

### 88.Biochemical Recurrence Status

Definition: **Biochemical recurrence calls based on the CPCTR PSA recurrence algorithm.**

Data Type: Character String

Table:

Validation

Rules:

Comments: This is calculated using the CPCTR PSA algorithm at the Central Database by IMS.

| Value              | Value Description                                |
|--------------------|--------------------------------------------------|
| Never Disease Free | Residual tumor present                           |
| No recurrence      | No recurrence                                    |
| PSA recurrence     | Recurred based on CPCTR PSA recurrence algorithm |
| Unknown            | Call cannot be determined using the algorithm    |

### 89. Recurrence PSA value

Definition: **PSA value which triggered a recurrence call using the CPCTR PSA recurrence algorithm.**

Data Type: Integer

Table:

Validation: Enter a positive number for PSA  $\geq 0.1$ . Enter -1 if unknown.

Rules:

Comments: This is calculated using the CPCTR PSA algorithm at the Central Database by IMS.

| Value   | Value Description      |
|---------|------------------------|
| Integer | >0; 9999, -1 (unknown) |

### 90. Date of Biochemical Recurrence Status

Definition: **Date when the Recurrence PSA value was reported.**

Data Type: Integer: MMYYYY

Table:

Validation: Month must be between 1 and 12. Enter 00 for unknown.

Rules:

Comments: This is calculated using the CPCTR PSA algorithm at the Central Database by IMS. If there is no recurrence, then the date last verified recurrence-free date is the same as the last post-prostatectomy PSA value.

| Value    | Value Description                                             |
|----------|---------------------------------------------------------------|
| 1-12, 00 | 2-digit month-Month (MM); 00 is standard fictionalized value. |
| YYYY     | 4-digit year-Year (YYYY); Must enter a valid year.            |

## CLINICALLY VERIFIED TISSUE RECURRENCE/METASTASIS:

These cases are those that do not have tissue blocks available, but are known clinically to have a recurrence/metastasis.

**NOTE: Verification for clinical recurrence can be via radiology imaging, biopsy/resection, or surgery. However, a clinician's note indicating recurrence in a specific distant site would be sufficient. However this does not include notes of recurrence because of PSA (Biochemical), note must say "bone, liver, etc. mets".**

### 91. Tissue Recurrence/Metastasis: Distant site 1

Definition: **Location of clinically verified tissue recurrence (site 1).**  
 Data Type: Character String  
 Table: tbl\_CPCTR.str\_221\_Distant\_Mets\_1  
 Validation  
 Rules:  
 Comments:

| Value                  | Value Description      |
|------------------------|------------------------|
| Bladder                | Bladder                |
| Blood                  | Blood                  |
| Bone                   | Bone                   |
| Bone Marrow            | Bone Marrow            |
| Brain                  | Brain                  |
| Carcinomatosis         | Carcinomatosis         |
| CNS                    | CNS                    |
| Generalized            | Generalized            |
| Liver                  | Liver                  |
| Local extension        | Local extension        |
| Lung                   | Lung                   |
| Lymph Nodes (Distant)  | Lymph Nodes (Distant)  |
| Lymph Nodes (Regional) | Lymph Nodes (Regional) |
| Peritoneum             | Peritoneum             |
| Rectum                 | Rectum                 |
| Skin                   | Skin                   |
| None                   | None                   |
| Other (NOS)            | Other (NOS)            |
| Unknown                | Unknown                |

**92.Date of Tissue Recurrence/Metastasis: Distant site 1**

Definition: **Date when tissue recurrence is clinically verified and documented in the medical chart.**  
 Data Type: Integer: MMYYYY  
 Table: tbl\_CPCTR.int\_Month\_Distant\_Mets\_1;  
 tbl\_CPCTR.int\_Year\_Distant\_Mets\_1  
 Validation  
 Rules:  
 Comments:

| Value    | Value Description                                             |
|----------|---------------------------------------------------------------|
| 1-12, 00 | 2-digit month-Month (MM); 00 is standard fictionalized value. |
| YYYY     | 4-digit year-Year (YYYY); Must enter a valid year.            |

**93.Tissue Recurrence/Metastasis: Distant site 2**

Definition: **Location of clinically verified tissue recurrence (site 2).**  
 Data Type: Character String  
 Table: tbl\_CPCTR.str\_223\_Distant\_Mets\_2  
 Validation  
 Rules:  
 Comments:

| Value                  | Value Description      |
|------------------------|------------------------|
| Bladder                | Bladder                |
| Blood                  | Blood                  |
| Bone                   | Bone                   |
| Bone Marrow            | Bone Marrow            |
| Brain                  | Brain                  |
| Carcinomatosis         | Carcinomatosis         |
| CNS                    | CNS                    |
| Generalized            | Generalized            |
| Liver                  | Liver                  |
| Local extension        | Local extension        |
| Lung                   | Lung                   |
| Lymph Nodes (Distant)  | Lymph Nodes (Distant)  |
| Lymph Nodes (Regional) | Lymph Nodes (Regional) |
| Peritoneum             | Peritoneum             |
| Rectum                 | Rectum                 |
| Skin                   | Skin                   |
| None                   | None                   |
| Other (NOS)            | Other (NOS)            |
| Unknown                | Unknown                |

**94. Date of Tissue Recurrence/Metastasis: Distant site 2**

Definition: **Date when tissue recurrence is clinically verified and documented in the medical chart.**

Data Type: Integer: MMYYYY

Table: tbl\_CPCTR.int\_Month\_Distant\_Mets\_2;  
tbl\_CPCTR.int\_Year\_Distant\_Mets\_2

Validation

Rules:

Comments:

| Value    | Value Description                                             |
|----------|---------------------------------------------------------------|
| 1-12, 00 | 2-digit month-Month (MM); 00 is standard fictionalized value. |
| YYYY     | 4-digit year-Year (YYYY); Must enter a valid year.            |

**95. Tissue Recurrence/Metastasis: Distant site 3**

Definition: **Location of clinically verified tissue recurrence (site 3).**

Data Type: Character String

Table: tbl\_CPCTR.str\_225\_Distant\_Mets\_3

Validation

Rules:

Comments:

| Value   | Value Description |
|---------|-------------------|
| Bladder | Bladder           |
| Blood   | Blood             |
| Bone    | Bone              |

|                        |                        |
|------------------------|------------------------|
| Bone Marrow            | Bone Marrow            |
| Brain                  | Brain                  |
| Carcinomatosis         | Carcinomatosis         |
| CNS                    | CNS                    |
| Generalized            | Generalized            |
| Liver                  | Liver                  |
| Local extension        | Local extension        |
| Lung                   | Lung                   |
| Lymph Nodes (Distant)  | Lymph Nodes (Distant)  |
| Lymph Nodes (Regional) | Lymph Nodes (Regional) |
| Peritoneum             | Peritoneum             |
| Rectum                 | Rectum                 |
| Skin                   | Skin                   |
| None                   | None                   |
| Other (NOS)            | Other (NOS)            |
| Unknown                | Unknown                |

**96. Date of Tissue Recurrence/Metastasis: Distant site 3**

Definition: **Date when tissue recurrence is clinically verified and documented in the medical chart.**

Data Type: Integer: MMYYYY

Table: tbl\_CPCTR.int\_Month\_Distant\_Mets\_3;  
tbl\_CPCTR.int\_Year\_Distant\_Mets\_3

Validation

Rules:

Comments:

| Value    | Value Description                                             |
|----------|---------------------------------------------------------------|
| 1-12, 00 | 2-digit month-Month (MM); 00 is standard fictionalized value. |
| YYYY     | 4-digit year-Year (YYYY); Must enter a valid year.            |

**97. General Comments for Clinically Verified Tissue Recurrence/Metastasis:**

Definition: **General comments related to clinically verified recurrence/metastasis.**

Data Type: Character String

Table: tbl\_CPCTR.str\_27\_Recurrence\_Comment

Validation

Rules:

Comments: To provide general comments on the clinically verified tissue recurrence or metastatic status of patient.

| Value     | Value Description                             |
|-----------|-----------------------------------------------|
| Free Text | Open text field (250 alphanumeric characters) |



## METASTATIC TISSUE BLOCK MATRIX: (Items #98-108 are multiple entry fields):

-Enter as many blocks available (Three blocks are preferred).

-If multiple metastatic sites are present, then enter at least 1 block from each site.

-Try to include at least one block of normal tissue from the same site if possible. If it is not possible to find a completely normal block then include one with minimal amounts of carcinoma.

### 98. Metastatic Block Matrix: Block number

Definition: **Block number of the block with largest tumor nodule in the metastatic tissue.**

Data Type: Character String

Table: tbl\_METS\_Matrix.str\_METS\_Block\_ID

Validation

Rules:

Comments:

| Value     | Value Description                                                 |
|-----------|-------------------------------------------------------------------|
| Free text | List surgical pathology block # from case (varies by institution) |

### 99. Metastatic Block Matrix: Specimen source

Definition: **Procedure/Method used to acquire specimen.**

Data Type: Character String

Table: tbl\_METS\_Matrix.str\_METS\_Specimen\_Source

Validation

Rules:

Comments:

| Value                | Value Description    |
|----------------------|----------------------|
| Biopsy               | Biopsy               |
| Resection            | Resection            |
| Fine Needle Aspirate | Fine Needle Aspirate |
| Other                | Other                |
| Unknown              | Unknown              |

### 100. Metastatic Block Matrix: Tissue Type

Definition: **Location of clinically verified tissue recurrence (site 3).**

Data Type: Character String

Table: tbl\_METS\_Matrix.str\_METS\_Tissue\_Type

Validation

Rules:

Comments:

| Value   | Value Description |
|---------|-------------------|
| Bladder | Bladder           |
| Blood   | Blood             |
| Bone    | Bone              |

|                        |                        |
|------------------------|------------------------|
| Bone Marrow            | Bone Marrow            |
| Brain                  | Brain                  |
| Carcinomatosis         | Carcinomatosis         |
| CNS                    | CNS                    |
| Generalized            | Generalized            |
| Liver                  | Liver                  |
| Local extension        | Local extension        |
| Lung                   | Lung                   |
| Lymph Nodes (Distant)  | Lymph Nodes (Distant)  |
| Lymph Nodes (Regional) | Lymph Nodes (Regional) |
| Peritoneum             | Peritoneum             |
| Rectum                 | Rectum                 |
| Skin                   | Skin                   |
| None                   | None                   |
| Other (NOS)            | Other (NOS)            |
| Unknown                | Unknown                |

### 101. Metastatic Block Matrix: Most Prominent Histological Type of Invasive Cancer

Definition: **Most prominent histological type present on metastatic block.**

Data Type: Character String

Table: tbl\_METS\_Matrix.str\_MET\_Most\_Prominent\_Histologic\_Type

Validation:

Rules:

Comments:

| Value                                     | Value Description                         |
|-------------------------------------------|-------------------------------------------|
| Adenocarcinoma NOS (aka acinar)           | Adenocarcinoma NOS (aka acinar)           |
| Basal cell carcinoma                      | Basal cell carcinoma                      |
| Ductal adenocarcinoma                     | Ductal adenocarcinoma                     |
| Lymphoma                                  | Lymphoma                                  |
| Mesenchymal tumor (NOS)                   | Mesenchymal tumor (NOS)                   |
| Mucinous adenocarcinoma                   | Mucinous adenocarcinoma                   |
| Neuroendocrine carcinoma                  | Neuroendocrine carcinoma                  |
| PIN only                                  | PIN only                                  |
| Sarcomatoid carcinoma                     | Sarcomatoid carcinoma                     |
| Signet ring adenocarcinoma                | Signet ring adenocarcinoma                |
| Small cell anaplastic carcinoma           | Small cell anaplastic carcinoma           |
| Squamous or adenosquamous carcinoma       | Squamous or adenosquamous carcinoma       |
| Transitional (not primary)                | Transitional (not primary)                |
| Undifferentiated non-small cell carcinoma | Undifferentiated non-small cell carcinoma |
| Other (specify in comments)               | Other (specify in comments)               |
| Unknown                                   | Unknown                                   |

### 102. Metastatic Block Matrix: Size of Largest Individual Nodule of Invasive Cancer (in cm)

Definition: **Size of invasive cancer present in metastatic block.**

Data Type: Double (number)  
 Table: tbl\_METS\_Matrix.dbl\_METS\_Size\_of\_Largest\_Nodule  
 Validation: Enter a positive number. Enter -1 if unknown.  
 Rules:  
 Comments:

| Value  | Value Description                         |
|--------|-------------------------------------------|
| Number | -1 Or ( $\geq 0$ And $< 100$ ) Or is Null |

### 103. Metastatic Block Matrix: Percentage of Tissue Occupied by Tumor

Definition: **Percentage of Tissue Occupied by Tumor in the metastatic block.**

Data Type: Character String  
 Table: tbl\_METS\_Matrix.str\_METS\_Percentage\_Tissue\_Occupied\_by\_Tumor  
 Validation:  
 Rules:  
 Comments:

| Value    | Value Description |
|----------|-------------------|
| <5%      | <5%               |
| 5 to 25% | 5 to 25%          |
| >25%     | >25%              |
| Unknown  | Unknown           |

### 104. Metastatic Block Matrix: Presence of Therapy effects

Definition: **Therapy effect: hormonal/radiation effect on tumor**

Data Type: Character String  
 Table: tbl\_METS\_Matrix.str\_METS\_Therapy\_Effect  
 Validation:  
 Rules:  
 Comments:

| Value   | Value Description |
|---------|-------------------|
| No      | No                |
| Yes     | Yes               |
| Unknown | Unknown           |

### 105. Metastatic Block Matrix: Non-Neoplastic Block number:

Definition: **Block with non-neoplastic tissue associated with the metastatic block submitted above.**

Data Type: Character String  
 Table: tbl\_METS\_Matrix.str\_METS\_Available\_NonNeoplastic\_Block\_ID  
 Validation:  
 Rules:  
 Comments: List only block number. If not available without tumor then block with largest amount of benign tissue.

| Value     | Value Description                                                 |
|-----------|-------------------------------------------------------------------|
| Free Text | List surgical pathology block # from case (varies by institution) |

**106. Metastatic Block Matrix: Type of Block(s) available**

Definition: **Type of metastatic block available.**

Data Type: Character String

Table: tbl\_METS\_Matrix.str\_METS\_Paraffin\_AND\_Frozen

Validation

Rules:

Comments:

| Value               | Value Description                                                                          |
|---------------------|--------------------------------------------------------------------------------------------|
| Paraffin only       | If this value is picked, then only paraffin block is available for this matrix.            |
| Frozen only         | If this value is picked, then only frozen block is available for this matrix.              |
| Paraffin and frozen | If this value is picked, then both Paraffin and frozen block is available for this matrix. |

**107. Date of Metastatic Block Matrix:**

Definition: **Date when metastatic tissue was removed/excised.**

Data Type: Integer: MMYYYY

Table: tbl\_METS\_Matrix.str\_METS\_Month;  
tbl\_METS\_Matrix.str\_METS\_Year

Validation

Rules:

Comments:

| Value    | Value Description                                             |
|----------|---------------------------------------------------------------|
| 1-12, 00 | 2-digit month-Month (MM); 00 is standard fictionalized value. |
| YYYY     | 4-digit year-Year (YYYY); Must enter a valid year.            |

**108. General Comments Section for Metastatic Block Matrix:**

Definition: **General comments related to metastatic specimens.**

Data Type: Character String

Table: tbl\_METS\_Matrix.str\_METS\_Comment

Validation

Rules:

Comments: To provide general comments on the metastatic specimens.

| Value     | Value Description                             |
|-----------|-----------------------------------------------|
| Free Text | Open text field (250 alphanumeric characters) |

## STAGING

Pathological and Clinical Staging will be based on using the AJCC Manual for Staging of Cancer, 5th Ed.

### PATHOLOGICAL STAGING:

#### 109. pT Stage\*\*

Definition: **Use Manual for Staging of Cancer, 5thEd. Report pT stage at initial diagnosis.**

Data Type: Character String

Table: tbl\_CPCTR.str\_230\_pT\_Stage

Validation

Rules:

- Comments:
- 1) T0 cases are eligible only for node positive cases where the nodal specimen or metastatic specimen is available and accessioned into the CPCTR.
  - 2) If both clinical and pathologic staging are available, then use pathology.
  - 3) For comments on values below:

\*Tumor found in one or both lobes by needle biopsy, but not palpable or reliably visible by imaging, is classified as T1c.

\*\*Invasion into the prostatic apex or into (but not beyond) the prostatic capsule is not classified as T3, but as T2.

| Value | Value Description                                                         |
|-------|---------------------------------------------------------------------------|
| pT0   | No evidence of primary tumor                                              |
| pT1   | Clinically inapparent tumor not palpable nor visible by imaging           |
| pT1a  | Tumor incidental histologic finding in 5% or less of tissue resected      |
| pT1b  | Tumor incidental histologic finding in more than 5% of tissue resected    |
| pT1c  | Tumor identified by needle biopsy (e.g., because of elevated PSA)         |
| pT2   | Tumor confined within prostate*                                           |
| pT2a  | Tumor involves 1 lobe                                                     |
| pT2b  | Tumor involves both lobes                                                 |
| pT3   | Tumor extends through the prostatic capsule**                             |
| pT3a  | Extracapsular extension (unilateral or bilateral)                         |
| pT3b  | Tumor invades seminal vesicle(s)                                          |
| pT4   | Tumor is fixed or invades adjacent structures other than seminal vesicles |
| pTX   | Primary tumor cannot be assessed                                          |

#### 110. pN Stage\*\*

Definition: **Use Manual for Staging of Cancer, 5thEd. Report pN stage at initial diagnosis.**

Data Type: Character String

Table: tbl\_CPCTR.str\_231\_pN\_Stage

Validation  
 Rules:  
 Comments:

| Value | Value Description                          |
|-------|--------------------------------------------|
| pN0   | No regional lymph node metastasis          |
| pN1   | Metastasis in regional lymph node or nodes |
| pNX   | Regional lymph nodes cannot be assessed    |

### 111. pM Stage\*\*

Definition: **Use Manual for Staging of Cancer, 5thEd. Report pM stage at initial diagnosis.**

Data Type: Character String

Table: tbl\_CPCTR.str\_232\_pM\_Stage

Validation

Rules:

Comments: For comments on values:

\*When more than one site of metastasis is present, the most advance category is used. pM1c is the most advance.

| Value | Value Description                     |
|-------|---------------------------------------|
| pM0   | No distant metastasis                 |
| pM1   | Distant metastasis                    |
| pM1a  | Non-regional lymph node(s)            |
| pM1b  | Bone(s)                               |
| pM1c  | Other site(s)*                        |
| pMX   | Distant metastasis cannot be assessed |

## CLINICAL STAGING:

### 112. cT Stage

Definition: **Use Manual for Staging of Cancer, 5thEd. Report cT stage at initial diagnosis.**

Data Type: Character String

Table: tbl\_CPCTR.str\_240\_Clinical\_T\_Stage

Validation

Rules:

- Comments:
- 1) T0 cases are eligible only for node positive cases where the nodal specimen or metastatic specimen is available and accessioned into the CPCTR.
  - 2) If both clinical and pathologic staging are available, then use pathology.
  - 3) For comments on values below:

\*Tumor found in one or both lobes by needle biopsy, but not palpable or reliably visible by imaging, is classified as T1c.

\*\*Invasion into the prostatic apex or into (but not beyond) the prostatic capsule is not classified as T3, but as T2.

| Value | Value Description                                                         |
|-------|---------------------------------------------------------------------------|
| T0    | No evidence of primary tumor                                              |
| T1    | Clinically inapparent tumor not palpable nor visible by imaging           |
| T1a   | Tumor incidental histologic finding in 5% or less of tissue resected      |
| T1b   | Tumor incidental histologic finding in more than 5% of tissue resected    |
| T1c   | Tumor identified by needle biopsy (e.g., because of elevated PSA)         |
| T2    | Tumor confined within prostate*                                           |
| T2a   | Tumor involves 1 lobe                                                     |
| T2b   | Tumor involves both lobes                                                 |
| T3    | Tumor extends through the prostatic capsule**                             |
| T3a   | Extracapsular extension (unilateral or bilateral)                         |
| T3b   | Tumor invades seminal vesicle(s)                                          |
| T4    | Tumor is fixed or invades adjacent structures other than seminal vesicles |
| TX    | Primary tumor cannot be assessed                                          |

### 113. cN Stage

Definition: **Use Manual for Staging of Cancer, 5thEd. Report cN stage at initial diagnosis.**

Data Type: Character String

Table: tbl\_CPCTR.str\_241\_Clinical\_N\_Stage

Validation

Rules:

Comments: If used this should be defined by a CT or MRI scan (usually of the pelvis).

| Value | Value Description                          |
|-------|--------------------------------------------|
| N0    | No regional lymph node metastasis          |
| N1    | Metastasis in regional lymph node or nodes |
| NX    | Regional lymph nodes cannot be assessed    |

### 114. cM Stage

Definition: **Use Manual for Staging of Cancer, 5thEd. Report cM stage at initial diagnosis.**

Data Type: Character String

Table: tbl\_CPCTR.str\_242\_Clinical\_M\_Stage

Validation

Rules:

Comments: 1) If used this should be defined by either a bone scan (most common), or a CT/MRI of the chest.  
2) For comments on values:

\*When more than one site of metastasis is present, the most advance category is used. pM1c is the most advance.

| Value | Value Description |
|-------|-------------------|
|-------|-------------------|

|     |                                       |
|-----|---------------------------------------|
| M0  | No distant metastasis                 |
| M1  | Distant metastasis                    |
| M1a | Non-regional lymph node(s)            |
| M1b | Bone(s)                               |
| M1c | Other site(s)*                        |
| MX  | Distant metastasis cannot be assessed |

### 115. General Staging Comments

Definition: **General Comments related to Staging (Pathological and Clinical).**

Data Type: Character String

Table: tbl\_CPCTR.str\_24\_Staging\_Comment

Validation

Rules:

Comments:

| Value     | Value Description                             |
|-----------|-----------------------------------------------|
| Free Text | Open text field (250 alphanumeric characters) |

## VITAL STATUS/FOLLOW UP DATE

Record the patient's vital status and most recent follow up date.

### Vital Status/Follow Up:

#### 116. Date Last Known Alive\*:

Definition: **Date should be linked to when the last follow up was done.**

Data Type: Integer: MMYYYY

Table: tbl\_CPCTR.int\_260\_Month\_Last\_Known\_Alive;

tbl\_CPCTR.int\_261\_Year\_Last\_Known\_Alive

Validation

Rules:

Comments: Record the most recent date on which contact was made with the patient, or it was verified through a tumor registrar, physician, or clinical record that the patient was alive. If the patient has died, then the date in this field remains fixed at the last time the patient was verified to be alive, and no further updating is necessary. The death date (if known) is then entered into Field *Date of Death*. If an attempt was made to follow up the patient history but no new data was collected since the last follow up, make a note in the comments that an attempt was made on a specific date, and that the case may be "lost to follow up".

| Value    | Value Description                                             |
|----------|---------------------------------------------------------------|
| 1-12, 00 | 2-digit month-Month (MM); 00 is standard fictionalized value. |



|      |                                                    |
|------|----------------------------------------------------|
| YYYY | 4-digit year-Year (YYYY); Must enter a valid year. |
|------|----------------------------------------------------|

**117. Date of Death:**

Definition: **Enter the date when patient is known to have died.**

Data Type: Integer: MMYYYY

Table: tbl\_CPCTR.int\_262\_Month\_of\_Death;

tbl\_CPCTR.int\_263\_Year\_of\_Death

Validation

Rules:

Comments: If it is known that the patient is dead, but date of death is unknown, code as 00 for month and estimate the year based on medical record (i.e. Enter the year patient was last known alive date). If year but not month is known, then code as 00YYYY.

| Value    | Value Description                                             |
|----------|---------------------------------------------------------------|
| 1-12, 00 | 2-digit month-Month (MM); 00 is standard fictionalized value. |
| YYYY     | 4-digit year-Year (YYYY); Must enter a valid year.            |

**118. Vital Status\*:**

Definition: **Using the most accurate information available, which could include the patient’s medical chart, a physician chart, another tumor registry, record patient vital status.**

Data Type: Character String

Table: tbl\_CPCTR.str\_264\_Vital\_Status

Validation 1) If Alive or Lost to follow up, then date of death must be blank and Date last known alive must be completed.

Rules: 2) If dead, then date of death must not be blank.

Comments: If an attempt was made to follow up the patient history but no new data was collected since the last follow up, make a note in the comments that an attempt was made on a specific date, and that the case may be “lost to follow up”.

| Value                  | Value Description                                                                                                            |
|------------------------|------------------------------------------------------------------------------------------------------------------------------|
| Alive                  | Alive                                                                                                                        |
| Dead                   | Dead                                                                                                                         |
| Dead with warm autopsy | Dead with warm autopsy                                                                                                       |
| Lost to follow up      | Must try to find updated follow up information for at least 3 times (once per year). If no new information added, code this. |

**119. Final Comments:**

Definition: **General final comments related to this patient.**

Data Type: Character String

Table: tbl\_CPCTR.str\_25\_Final\_Comment

Validation

Rules:

Comments: This comments field may be used to describe any information

regarding this index prostate cancer case, including vital status comments.

| Value     | Value Description                             |
|-----------|-----------------------------------------------|
| Free Text | Open text field (250 alphanumeric characters) |

## THERAPY MATRIX

Record the patient's treatment history.

Therapy Matrix: (Items #120-123 are multiple entry fields):

### 120. Therapy matrix: Type of Therapy

Definition: **Report type of therapy patient was given.**

Data Type: Character String

Table: tbl\_Therapy\_Matrix.str\_Tx\_Type

Validation

Rules:

Comments: If there is no mention or record of therapy, leave blank, do not assume none was given.

| Value                       | Value Description                         |
|-----------------------------|-------------------------------------------|
| Alternative Therapy         | Alternative Therapy (specify in comments) |
| Brachytherapy               | Brachytherapy                             |
| Chemotherapy                | Chemotherapy                              |
| Cryotherapy                 | Cryotherapy                               |
| Experimental                | Experimental (specify in comments)        |
| External Beam Radiation     | External Beam Radiation                   |
| Hormone Therapy, NOS        | Hormone therapy, NOS                      |
| Immunotherapy               | Immunotherapy                             |
| Medical hormone suppression | Medical hormone suppression               |
| Radiation Therapy, NOS      | Radiation Therapy, NOS                    |
| Surgical orchiectomy        | Surgical orchiectomy                      |
| Watchful waiting            | Watchful waiting                          |

### 121. Therapy matrix: Therapy Start Date

Definition: **Enter the date when patient started treatment.**

Data Type: Integer: MMYYYY

Table: tbl\_Therapy\_Matrix.int\_TX\_Start\_Month;  
tbl\_Therapy\_Matrix.int\_TX\_Start\_Year

Validation

Rules:

Comments: Include even if therapy is delivered greater than 6 months post diagnosis.

| Value    | Value Description                                             |
|----------|---------------------------------------------------------------|
| 1-12, 00 | 2-digit month-Month (MM); 00 is standard fictionalized value. |
| YYYY     | 4-digit year-Year (YYYY); Must enter a valid year.            |

### 122. Therapy matrix: Per Initial Treatment Plan? \*\*

Definition: **Report if this treatment was part of the initial, planned therapy.**

Data Type: Character String

Table: tbl\_Therapy\_Matrix.str\_TX\_Per\_Initial\_Treatment\_Plan

Validation If there is no treatment plan, established protocol, or

Rules: management guidelines, and consultation with a physician advisor is not possible, use the principle: 'initial treatment must begin within four months of the date of initial diagnosis.

Comments:

| Value   | Value Description |
|---------|-------------------|
| No      | No                |
| Yes     | Yes               |
| Unknown | Unknown           |

### 123. Therapy Matrix Comments:

Definition: **General comments related to this patients treatment.**

Data Type: Character String

Table: tbl\_Therapy\_Matrix.str\_TX\_Comment

Validation

Rules:

Comments:

| Value     | Value Description                             |
|-----------|-----------------------------------------------|
| Free Text | Open text field (250 alphanumeric characters) |

### Additional overall Therapy comments:

#### 124. Comments on Therapy Response:

Definition: **General comments related to this patients response to treatment.**

Data Type: Character String

Table: tbl\_CPCTR.str\_276\_Therapy\_Response\_Comment\_Field

Validation

Rules:

Comments:

| Value     | Value Description                             |
|-----------|-----------------------------------------------|
| Free Text | Open text field (250 alphanumeric characters) |

#### 125. General Overall Comments on Therapy:

Definition: **General comments related to this patients treatment.**

Data Type: Character String

Table: tbl\_CPCTR.str\_275\_Therapy\_Comment\_Field  
 Validation  
 Rules:  
 Comments:

| Value     | Value Description                             |
|-----------|-----------------------------------------------|
| Free Text | Open text field (250 alphanumeric characters) |

**NEEDLE BIOPSY BLOCK MATRIX: (Items #126-134 are multiple entry fields. Up to 5 blocks preferred)**

- The needle biopsy block matrix section will allow the collection of block details on biopsy samples that meet the minimum requirements for inclusion into the Resource.
- For needle biopsy cases, the concern was to give the reviewers some guidance on how many blocks to submit and to clarify what happens when there is only one block with tumor. In these cases it was recommended that the institution cut 3 to 5 blanks for their own diagnostic purposes and then make the residual material available to the CPCTR archive.
- We decided that a matrix would be set up and leave the number of blocks submitted to the reviewing pathologist, encouraging them to submit as many blocks as possible on a needle biopsy to a maximum of 5. There is no particular order for entering blocks into the needle biopsy matrix.
- Here are the recommended criteria for needle biopsy:
  - 3) Can include one block or more (up to 5)
  - 4) Must at least include one neoplastic block and classify according to the needle biopsy matrix.

NOTE: for biopsy-only cases, it is a requirement to enter the "subsequent prostatectomy" field in the biopsy attribute section. "Biopsy-Only" cases are cases due to advance disease or other reasons that did NOT lead to a prostatectomy.

**126. Biopsy Matrix: Block number**

Definition: **Block number of the block with largest tumor nodule.**  
 Data Type: Character String  
 Table: tbl\_Biopsy\_Matrix.str\_MB\_Block\_Number  
 Validation  
 Rules:  
 Comments:

| Value     | Value Description                                                 |
|-----------|-------------------------------------------------------------------|
| Free text | List surgical pathology block # from case (varies by institution) |

**127. Biopsy Matrix: Most Prominent Histological Type of Invasive Cancer**

Definition: **Most prominent histological type present on block.**  
 Data Type: Character String  
 Table: tbl\_Biopsy\_Matrix.str\_MB\_Most\_Prominent\_Histologic\_Type\_Invasive\_Cancer  
 Validation: If PIN only, then (*Biopsy-Gleason Grading*) should be blank and (*Biopsy-PIN*)  
 Rules: should be checked YES.  
 Comments:

| Value                                     | Value Description                         |
|-------------------------------------------|-------------------------------------------|
| Adenocarcinoma NOS (aka acinar)           | Adenocarcinoma NOS (aka acinar)           |
| Basal cell carcinoma                      | Basal cell carcinoma                      |
| Ductal adenocarcinoma                     | Ductal adenocarcinoma                     |
| Lymphoma                                  | Lymphoma                                  |
| Mesenchymal tumor (NOS)                   | Mesenchymal tumor (NOS)                   |
| Mucinous adenocarcinoma                   | Mucinous adenocarcinoma                   |
| Neuroendocrine carcinoma                  | Neuroendocrine carcinoma                  |
| PIN only                                  | PIN only                                  |
| Sarcomatoid carcinoma                     | Sarcomatoid carcinoma                     |
| Signet ring adenocarcinoma                | Signet ring adenocarcinoma                |
| Small cell anaplastic carcinoma           | Small cell anaplastic carcinoma           |
| Squamous or adenosquamous carcinoma       | Squamous or adenosquamous carcinoma       |
| Transitional (not primary)                | Transitional (not primary)                |
| Undifferentiated non-small cell carcinoma | Undifferentiated non-small cell carcinoma |
| Other (specify in comments)               | Other (specify in comments)               |
| Unknown                                   | Unknown                                   |

### 128. Biopsy Matrix: Primary Gleason Grade

Definition: **Primary Gleason grade of block**  
 Data Type: Character String  
 Table: tbl\_Biopsy\_Matrix.str\_MB\_Primary\_Gleason\_Grade  
 Validation: If "not adenocarcinoma" then (*Biopsy-Most prominent histological type*) must be either basal cell carcinoma, transitional (not primary), undifferentiated non-small cell carcinoma, sarcomatoid carcinoma, neuroendocrine carcinoma, small cell anaplastic carcinoma, squamous or adenosquamous carcinoma, mesenchymal tumor (NOS), lymphoma, other (specify in comments), or unknown.  
 Rules:

Comments:

| Value              | Value Description  |
|--------------------|--------------------|
| 1                  | 1                  |
| 2                  | 2                  |
| 3                  | 3                  |
| 4                  | 4                  |
| 5                  | 5                  |
| Not adenocarcinoma | Not adenocarcinoma |
| Not primary tumor  | Not primary tumor  |
| PIN only           | PIN only           |
| Unknown            | Unknown            |

**129. Biopsy Matrix: Secondary Gleason Grade**

Definition: **Secondary Gleason grade of block**

Data Type: Character String

Table: tbl\_Biopsy\_Matrix.str\_MB\_Secondary\_Gleason\_Grade

Validation If "not adenocarcinoma" then (*Biopsy-Most prominent histological type*) must be either basal cell carcinoma,

transitional (not primary), undifferentiated non-small cell carcinoma, sarcomatoid carcinoma, neuroendocrine carcinoma, small cell anaplastic carcinoma, squamous or adenosquamous carcinoma, mesenchymal tumor (NOS), lymphoma, other (specify in comments), or unknown.

Comments:

| Value              | Value Description  |
|--------------------|--------------------|
| 1                  | 1                  |
| 2                  | 2                  |
| 3                  | 3                  |
| 4                  | 4                  |
| 5                  | 5                  |
| Not adenocarcinoma | Not adenocarcinoma |
| Not primary tumor  | Not primary tumor  |
| PIN only           | PIN only           |
| Unknown            | Unknown            |

**130. Biopsy Matrix: Size of Largest Individual Nodule of Invasive Cancer (in cm)**

Definition: **Size of invasive cancer present in block.**

Data Type: Double (number)

Table: tbl\_Biopsy\_Matrix.dbl\_MB\_Length\_of\_Core

Validation Enter a positive number. Enter -1 if unknown.

Rules:

Comments:

| Value  | Value Description               |
|--------|---------------------------------|
| Number | -1 Or (>=0 And <100) Or is Null |

**131. Biopsy Matrix: Presence of High Grade Prostatic Intraepithelial Neoplasia (PIN)**

Definition: **Presence of High Grade PIN in block.**

Data Type: Yes/No

Table: tbl\_Biopsy\_Matrix.str\_MB\_PIN

Validation

Rules:

Comments:

| Value     | Value Description                                                     |
|-----------|-----------------------------------------------------------------------|
| Check box | If box is checked, then the PIN value is Yes, otherwise, value is No. |

**132. Biopsy Matrix: Presence of Perineural Invasion (PN)**

Definition: **Presence of Perineural Invasion in block.**

Data Type: Yes/No

Table: tbl\_Biopsy\_Matrix.str\_MB\_PN

Validation

Rules:

Comments:

| Value     | Value Description                                                    |
|-----------|----------------------------------------------------------------------|
| Check box | If box is checked, then the PN value is Yes, otherwise, value is No. |

**133. Biopsy Matrix: Presence of Angiolymphatic Invasion (AL)**

Definition: **Presence of Angiolymphatic Invasion in block.**

Data Type: Yes/No

Table: tbl\_Biopsy\_Matrix.str\_MB\_AL

Validation

Rules:

Comments:

| Value     | Value Description                                                    |
|-----------|----------------------------------------------------------------------|
| Check box | If box is checked, then the AL value is Yes, otherwise, value is No. |

**134. Biopsy Matrix: block comments**

Definition: **Comments related to paraffin block matrix.**

Data Type: Character String

Table: tbl\_Biopsy\_Matrix.str\_MB\_Comment

Validation

Rules:

Comments:

| Value     | Value Description                             |
|-----------|-----------------------------------------------|
| Free Text | Open text field (250 alphanumeric characters) |

**NEEDLE BIOPSY ATTRIBUTES:**

- Enter the overall characteristics of the biopsy.
- For "biopsy-only" cases, the subsequent prostatectomy field is a required field.

**NOTE: "Biopsy-Only" cases are cases due to advance disease or other reasons that did NOT lead to a prostatectomy.**

**135. Biopsy: Most Prominent Histological Type of Invasive Cancer**

Definition: **Most prominent overall histological type present in the biopsy.**

Data Type: Character String  
 Table: tbl\_CPCTR.str\_Biopsy\_Most\_Prominent\_Histologic\_Type  
 Validation If PIN only, then (*Biopsy Gleason Grading*) should be "PIN only" and (*Biopsy Rules: High Grade PIN*) cannot be "no" or "unknown".  
 Comments:

| Value                                     | Value Description                         |
|-------------------------------------------|-------------------------------------------|
| Adenocarcinoma NOS (aka acinar)           | Adenocarcinoma NOS (aka acinar)           |
| Basal cell carcinoma                      | Basal cell carcinoma                      |
| Ductal adenocarcinoma                     | Ductal adenocarcinoma                     |
| Lymphoma                                  | Lymphoma                                  |
| Mesenchymal tumor (NOS)                   | Mesenchymal tumor (NOS)                   |
| Mucinous adenocarcinoma                   | Mucinous adenocarcinoma                   |
| Neuroendocrine carcinoma                  | Neuroendocrine carcinoma                  |
| PIN only                                  | PIN only                                  |
| Sarcomatoid carcinoma                     | Sarcomatoid carcinoma                     |
| Signet ring adenocarcinoma                | Signet ring adenocarcinoma                |
| Small cell anaplastic carcinoma           | Small cell anaplastic carcinoma           |
| Squamous or adenosquamous carcinoma       | Squamous or adenosquamous carcinoma       |
| Transitional (not primary)                | Transitional (not primary)                |
| Undifferentiated non-small cell carcinoma | Undifferentiated non-small cell carcinoma |
| Other (specify in comments)               | Other (specify in comments)               |
| Unknown                                   | Unknown                                   |

### 136. Biopsy: Primary Gleason Grade

Definition: **Primary Gleason grade of the biopsy.**

Data Type: Character String

Table: tbl\_CPCTR.str\_Biopsy\_Gleason\_Primary\_Grade

Validation If not "adenocarcinoma" then (*Biopsy Most prominent*

Rules: *histological type*) must be either basal cell carcinoma, transitional (not primary), undifferentiated non-small cell carcinoma, sarcomatoid carcinoma, neuroendocrine carcinoma, small cell anaplastic carcinoma, squamous or adenosquamous carcinoma, mesenchymal tumor (NOS), lymphoma, other (specify in comments), or unknown.

Comments:

| Value              | Value Description  |
|--------------------|--------------------|
| 1                  | 1                  |
| 2                  | 2                  |
| 3                  | 3                  |
| 4                  | 4                  |
| 5                  | 5                  |
| Not adenocarcinoma | Not adenocarcinoma |
| Not primary tumor  | Not primary tumor  |
| PIN only           | PIN only           |
| Unknown            | Unknown            |

### 137. Biopsy: Secondary Gleason Grade



Definition: **Secondary Gleason grade of the biopsy.**

Data Type: Character String

Table: tbl\_CPCTR.str\_Biopsy\_Gleason\_Secondary\_Grade

Validation If not "adenocarcinoma" then (*Biopsy Most prominent*

Rules: *histological type*) must be either basal cell carcinoma, transitional (not primary), undifferentiated non-small cell carcinoma, sarcomatoid carcinoma, neuroendocrine carcinoma, small cell anaplastic carcinoma, squamous or adenosquamous carcinoma, mesenchymal tumor (NOS), lymphoma, other (specify in comments), or unknown.

Comments:

| Value              | Value Description  |
|--------------------|--------------------|
| 1                  | 1                  |
| 2                  | 2                  |
| 3                  | 3                  |
| 4                  | 4                  |
| 5                  | 5                  |
| Not adenocarcinoma | Not adenocarcinoma |
| Not primary tumor  | Not primary tumor  |
| PIN only           | PIN only           |
| Unknown            | Unknown            |

### 138. Biopsy: Gleason Sum Score

Definition: **Gleason sum score of the biopsy.**

Data Type: Character String

Table: tbl\_CPCTR.str\_Biopsy\_Gleason\_Sum\_Score

Validation 1) If not "adenocarcinoma" then (*Biopsy-Most prominent*

Rules: *histological type*) must be either basal cell carcinoma, transitional (not primary), undifferentiated non-small cell carcinoma, sarcomatoid carcinoma, neuroendocrine carcinoma, small cell anaplastic carcinoma, squamous or adenosquamous carcinoma, mesenchymal tumor (NOS), lymphoma, other (specify in comments), or unknown.

2) If *Biopsy-Gleason* sum is 6 or 7 must answer "*Biopsy-Percentage of Gleason 4/5 grade (in all of 6's and 7's)*".

3) Sum of character values in (*Biopsy-Primary Gleason*) and (*Biopsy-Secondary Gleason*) must equal sum of value in (*Biopsy-Gleason Sum*).

Comments:

| Value | Value Description |
|-------|-------------------|
| 2     | 2                 |
| 3     | 3                 |
| 4     | 4                 |
| 5     | 5                 |
| 6     | 6                 |
| 7     | 7                 |
| 8     | 8                 |

|                    |                    |
|--------------------|--------------------|
| 9                  | 9                  |
| 10                 | 10                 |
| Not adenocarcinoma | Not adenocarcinoma |
| Not primary tumor  | Not primary tumor  |
| PIN only           | PIN only           |
| Unknown            | Unknown            |

**139. Biopsy: Percentage of Gleason 4/5 grade (in all of 6's and 7's)**

Definition: **Percentage of Gleason 4/5 Grade present in the prostatectomy with Gleason sum score of 6 and 7. Underscores prognostic significance of tiny component of Gleason 4 and 5 tumor in Gleason 6 and 7 tumors.**

Data Type: Integer (number)

Table: tbl\_CPCTR.int\_Biopsy\_Percentage\_Gleason

Validation 1) If (*Biopsy-Percentage Gleason 4/5*) is filled in as great than 10, then (*Biopsy-Gleason Sum*) must have a character value of 6 or 7.

Rules: 2) And character value in either (*Biopsy-Primary Gleason*) and (*Biopsy-Secondary Gleason*) or both must include a "Gleason score 4" or a "Gleason score 5" (i.e. choices are 4,4; 4,5; 5,5; 5,4)

Comments:

| Value       | Value Description                |
|-------------|----------------------------------|
| Integer (%) | -1 Or (>=0 And <=100) Or is Null |

**140. Percentage of Biopsy Occupied by Tumor**

Definition: **Percentage of Gland Occupied by Tumor in the prostatectomy.**

Data Type: Character String

Table: tbl\_CPCTR.str\_Percentage\_Biopsy\_Occupied\_by\_Tumor

Validation Value (Volume?) may be unknown (-1) only if pathologic T

Rules: Stage is known (not "TX"), or if pathologic M Stage is "M1".

Comments:

| Value    | Value Description |
|----------|-------------------|
| <5%      | <5%               |
| 5 to 25% | 5 to 25%          |
| >25%     | >25%              |
| Unknown  | Unknown           |

**141. Biopsy: Presence of High Grade Prostatic Intraepithelial Neoplasia**

Definition: **Is High Grade Prostatic Intraepithelial Neoplasia present in the biopsy?**

Data Type: Character String

Table: tbl\_CPCTR.str\_Biopsy\_Prostatic\_Intraepithelial\_Neoplasia\_Present

Validation

Rules:

Comments:

| Value                                   | Value Description                       |
|-----------------------------------------|-----------------------------------------|
| No                                      | No                                      |
| Unknown                                 | Unknown                                 |
| Yes-focality unknown                    | Yes-focality unknown                    |
| Yes-multifocal                          | Yes-multifocal                          |
| Yes-one or two foci away from the tumor | Yes-one or two foci away from the tumor |
| Yes-one or two foci in region of tumor  | Yes-one or two foci in region of tumor  |

#### 142. Biopsy: Non-Neoplastic Block #1:

Definition: **Block number of non-neoplastic biopsy block #1**

Data Type: Character String

Table: tbl\_CPCTR.str\_Biopsy\_Nonneoplastic\_Block

Validation

Rules:

Comments: Should be free of PIN or Cancer if possible.

| Value     | Value Description                                                 |
|-----------|-------------------------------------------------------------------|
| Free Text | List surgical pathology block # from case (varies by institution) |

#### 143. Subsequent Prostatectomy:\*\*

Definition: **Specifies whether a subsequent prostatectomy occurred. This field will help clarify cases where only biopsy specimens are available.**

Data Type: Character String

Table: tbl\_CPCTR.str\_Subsequent\_Prostatectomy\_Status

Validation 1) If "No", then prostatectomy attributes and matrix fields should be NULL.

Rules: 2) If "Yes", then the Prostatectomy Date (if known) must be recorded in the (*Date of prostatectomy*).

Comments: 1) This is a required field for biopsy-only cases.  
 2) Any other information regarding the off-site prostatectomy can be recorded in the (*subsequent prostatectomy comment*) field.  
 3) NOTE: "Biopsy-Only" cases are cases due to advance disease or other reasons that did NOT lead to a prostatectomy.

| Value   | Value Description |
|---------|-------------------|
| No      | No                |
| Yes     | Yes               |
| Unknown | Unknown           |

#### 144. Subsequent Prostatectomy comments:

Definition: **General comments related to the subsequent prostatectomy for biopsy-only cases.**

Data Type: Character String

Table: tbl\_CPCTR.str\_Subsequent\_Prostatectomy\_Status

Validation

Rules:

Comments: This field is NOT EXPORTED to the CPCTR. ONLY THE HOST SITE WILL HAVE ACCESS TO THE "OFF-SITE" INFORMATION, Due to HIPAA concerns. Its purpose is to:

- 1) Each site may well keep it for internal use to record any information regarding the "off-site" location and other particulars about the prostatectomy for documentation.
- 2) NOTE: "Biopsy-Only" cases are cases due to advance disease or other reasons that did NOT lead to a prostatectomy.

| Value     | Value Description                             |
|-----------|-----------------------------------------------|
| Free Text | Open text field (250 alphanumeric characters) |

#### 145. General Comments on Biopsy:

Definition: **General comments related to the biopsy.**

Data Type: Character String

Table: tbl\_CPCTR.str\_Biopsy\_General\_Comment

Validation

Rules:

Comments:

| Value     | Value Description                             |
|-----------|-----------------------------------------------|
| Free Text | Open text field (250 alphanumeric characters) |
