# Supplementary material for: The development of common data elements for a multi-institute prostate cancer tissue bank: The Cooperative Prostate Cancer Tissue Resource (CPCTR) experience
Source: PubMed Central journal article supplement (PMC1236914; doi:10.1186/1471-2407-5-108), 2005-08-21
Supplement: 1471-2407-5-108-S2.pdf [file 1471-2407-5-108-S2.pdf]

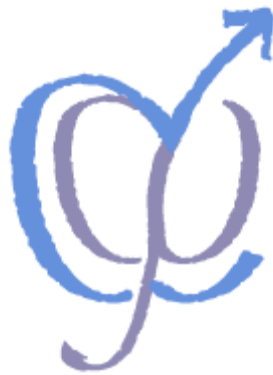

CPCTR

**CPCTR Common Data Elements for  
Collection of Prostate Cancer Specimens  
PAPER FORMS version 16  
[Data Dictionary Version 22 (09/14/04)]**

## USER INSTRUCTIONS

### **Form Completion Guidelines:**

- 1) Priorities for completing the form are to fill out all required elements followed by any subset of data that will allow for inclusion in the CPCTR databank. In our recent conference call there were two approaches to this suggested: **a) fill out the pathology data (suggested by Jan Orenstein) and fill in the clinical sections later, or b) fill in the basic required elements as well as a core of pathology data (Jules Berman, Mike Becich)**. In either case, the final goal is to complete as many data elements as possible.
- 2) Any corrections or changes to the forms should be e-mailed to Ashokkumar A. Patel at [patelaa@upmc.edu](mailto:patelaa@upmc.edu).

### **STEPS involved in initial screening, inclusion and classification of CPCTR cases**

#### **STEP 1 - Pre-screening cases (Research Assistant's Role) -**

**Required Data Elements Pre-Check - these data element searches are recommended before pathologist review. Make sure the case has the following REQUIRED data elements before beginning microscopic examination:**

- **At least 2 blocks are available on case that include prostate tumor or 1 block for biopsy-only or metastatic cases.**
- **Date of Birth, Race, Date of Diagnosis and Vital Status must be available to qualify a case and should be collected before microscopic exam and central review by the pathologist is initiated.**
- **Also # Nodes Examined/Positive must be available.**

**NOTE: If these data elements are not found, make a record of this case this for later discussion. We must determine the exclusion rate and if too high we may need modified "required" (asterisked) data elements.**

#### **STEP 2 - Pathologist Exam - the "pre-screened case" is given to pathologist who begins data recording (Pathologist's Role).**

**Pathologist determines priorities for entering cases in prostatectomy matrix (Pathologist's Role)**

- **Priorities for entering cases in prostatectomy neoplastic block matrix**
- These should assist the teams in picking the highest value blocks for the CPCTR archives.
- Since the matrix can include up to 5 blocks here are the recommendations for selection criteria:
  - 1) The first block should include the largest nodule of tumor (as specified by the CDE)

- 2) The third through fifth blocks should include seminal vesicle invasion, ECE or angiolymphatic invasion (in that order of preference)
- 3) The second block should include the largest amount of PIN and preferred is an area of PIN that is independent of cancer (if that exists). If the blocks with PIN all also contain cancer that does not exclude them. Try then to pick a block that has the largest amount of PIN.
- 4) Try to include at least one block of normal prostate if possible if it is not possible to find a completely normal block then include one with minimal amounts of PIN or carcinoma. Seminal vesicle is not considered a good normal block.

**STEP 3 - Clinical Information Collection (Research Assistant's Role)** - If possible, fill out the remaining parts of the form and include the time it took to complete this subsection.

**STEP 4 - Needle biopsy CDE guidelines (Pathologist's Role)**. For needle biopsy cases, a matrix similar to the prostatectomy was developed and the criteria are:

- 1) Can include one block or more (up to a maximum of 5).
- 2) Must at least include one block and classify according to the needle biopsy matrix.
- 3) Try to include one block of normal prostate if possible.

**STEP 5 - Frozen Tissue Prostatectomy archive guidelines (Pathologist's Role)**

- Since we have not really started accruing cases it was decided to keep the exclusionary criteria to a minimum until we have a better idea from each site actually reviewing cases.
- Therefore the only criteria we recommend currently are:
  - At least 1 neoplastic block or more need to be able to be entered into the matrix or case is excluded.

**STEP 6 - Metastasis CDE guidelines (Pathologist's Role)**.

For metastatic cases, a matrix similar to the prostatectomy was developed and the criteria are:

- 1) Can include one block or more (up to a maximum of 5).
- 2) Must at least include one block and classify according to the metastatic matrix.
- 3) Try to include one block of normal metastatic tissue if possible.

## Demographics

**Internal Reference Data (This section is not to be supplied to CPCTR only for internal record keeping use only and not to be passed on to IMS)**

1. Hospital Identifier: \_\_\_\_\_

2. Last Name: \_\_\_\_\_

3. First Name: \_\_\_\_\_

## Demographics

4. **Case Identifier\*:** \_\_\_\_\_  
(10-digit alphanumeric provided by IMS)

5. **Race\*:** (circle one):      **Caucasian**      **Pacific Islander**  
**African American**      **Hispanic**      **Asian**      **Native American**  
**Unknown**      **Not Available**      **Other (write in if known):** \_\_\_\_\_

6. **Other Race comments:**  
\_\_\_\_\_  
\_\_\_\_\_  
\_\_\_\_\_

7. **Hispanic Origin:** (circle one) **Yes**      **No**      **Unknown**

8. **Birth date\*:**    \_\_ \_\_ / \_\_ \_\_ \_\_ \_\_ (MM/YYYY)

## Clinical History

9. **Family History of Prostate Cancer:**  
(circle one)      **Yes**      **No**      **Unknown**

10. **Family History comments**  
\_\_\_\_\_  
\_\_\_\_\_  
\_\_\_\_\_

11. **Date of Diagnosis/Date of biopsy proven cancer\*:**  
\_\_ \_\_ / \_\_ \_\_ \_\_ \_\_ (MM/YYYY)

12. **General Demographic Comment Field:**  
\_\_\_\_\_  
\_\_\_\_\_  
\_\_\_\_\_

## SPECIMEN AVAILABILITY

This section will show the types of specimens available through the Resource.

NOTE: \* Case inclusion criteria: Any ONE question #13-20 below must say “YES”.  
(Specific inclusion criteria for each of the bio-specimens below are listed in their respective section)

### 13.Are Prostatectomy specimens available?\*

(circle one)      Yes              No              Unknown

### 14.Are Biopsy specimens available?\*

(circle one)      Yes              No              Unknown

### 15.Are Regional Lymph Node specimens available?\*

(circle one)      Yes              No              Unknown

### 16.Are Metastatic specimens available?\*

(circle one)      Yes              No              Unknown

### 17.Are Plasma samples available?\*

(circle one)      Yes              No              Unknown

### 18.Are Serum samples available?\*

(circle one)      Yes              No              Unknown

### 19.Are Red Blood Cells (RBCs) available?\*

(circle one)      Yes              No              Unknown

### 20.Are Peripheral Blood Mononuclear Cells (PBMCs) available?\*

(circle one)      Yes              No              Unknown

# PROSTATIC SPECIFIC ANTIGEN (PSA)

## DIAGNOSTIC PSA:

21.PSA value that prompted Diagnostic Biopsy which showed cancer

\_\_ \_\_ \_\_ \_\_ . \_\_ [>0.0; 9999.0, -1 (unknown)]

22.Date of PSA that Prompted Diagnostic Biopsy which showed cancer

\_\_ \_\_ / \_\_ \_\_ \_\_ \_\_ (MM/YYYY)

23.General comments for Diagnostic PSA:

---

---

---

---

## PSA MATRIX: (Items #24-27 are multiple entry fields)

The PSA matrix section will allow the collection of multiple PSA values that are prior to and after the diagnostic PSA value. We can write scripts to separate the pre-biopsy (for biopsy-only cases)/pre-prostatectomy PSAs from the post-biopsy/pre-prostatectomy PSAs to determine the biochemical recurrence. We can also calculate the diagnostic PSA since we know the biopsy date and all the PSA dates, and will identify the date of the PSA just before the biopsy. Thus, the central database will take the PSA and Date, sort by date, and calculate the needed results. This also allows one to enter in dates in any order (if much later you get an old chart with more values).

24.PSA below threshold (<0.1):

25.PSA value (pre/post diagnostic only)

26.Date of PSA

27.General comments for PSA matrix

(PLEASE ENTER DATA IN THE PSA MATRIX TABLE BELOW)





**PSA MATRIX TABLE:**

| <b>PSA below threshold (&lt;0.1)</b><br><small>(Circle YES or NO)</small> | <b>PSA value (pre/post diagnostic only)</b><br><small>[&gt;0.0; 9999.0, -1 (unknown)]</small> | <b>Date of PSA (Month)</b><br><small>(MM)</small> | <b>Date of PSA (Year)</b><br><small>(YYYY)</small> | <b>General comments for PSA matrix</b> |
|---------------------------------------------------------------------------|-----------------------------------------------------------------------------------------------|---------------------------------------------------|----------------------------------------------------|----------------------------------------|
| <b>Y</b> <b>N</b>                                                         |                                                                                               |                                                   |                                                    |                                        |
| <b>Y</b> <b>N</b>                                                         |                                                                                               |                                                   |                                                    |                                        |
| <b>Y</b> <b>N</b>                                                         |                                                                                               |                                                   |                                                    |                                        |
| <b>Y</b> <b>N</b>                                                         |                                                                                               |                                                   |                                                    |                                        |
| <b>Y</b> <b>N</b>                                                         |                                                                                               |                                                   |                                                    |                                        |
| <b>Y</b> <b>N</b>                                                         |                                                                                               |                                                   |                                                    |                                        |
| <b>Y</b> <b>N</b>                                                         |                                                                                               |                                                   |                                                    |                                        |
| <b>Y</b> <b>N</b>                                                         |                                                                                               |                                                   |                                                    |                                        |
| <b>Y</b> <b>N</b>                                                         |                                                                                               |                                                   |                                                    |                                        |
| <b>Y</b> <b>N</b>                                                         |                                                                                               |                                                   |                                                    |                                        |
| <b>Y</b> <b>N</b>                                                         |                                                                                               |                                                   |                                                    |                                        |
| <b>Y</b> <b>N</b>                                                         |                                                                                               |                                                   |                                                    |                                        |
| <b>Y</b> <b>N</b>                                                         |                                                                                               |                                                   |                                                    |                                        |
| <b>Y</b> <b>N</b>                                                         |                                                                                               |                                                   |                                                    |                                        |
| <b>Y</b> <b>N</b>                                                         |                                                                                               |                                                   |                                                    |                                        |
| <b>Y</b> <b>N</b>                                                         |                                                                                               |                                                   |                                                    |                                        |

# ANATOMICAL PATHOLOGY GRADING AND CHARACTERISTICS

## PARAFFIN BLOCK MATRIX: (Items #28-40 are multiple entry fields. Up to 5 blocks preferred)

The Paraffin block matrix section will allow the collection of block details on cases that meet the minimum requirements for inclusion (1 paraffin blocks with tumor) into the Resource. NOTE: Priorities for entering cases in prostatectomy neoplastic block matrix

- These should assist the teams in picking the highest value blocks for the CPCTR archives.
- Since the matrix can include up to 5 blocks here are the recommendations for selection criteria:
  - 1) The first block (block a) should include the largest nodule of tumor (as specified by the CDE)
  - 2) The third through fifth blocks (blocks c, d, e) should include seminal vesicle invasion, ECE or angiolymphatic invasion (in that order of preference) NOTE: If SV, ECE, AL do not occur, select the next largest area of tumor for 3 to 5 of the matrix.
  - 3) The second block (block b) should include the largest amount of PIN and preferred is an area of PIN that is independent of cancer (if that exists). If the blocks with PIN all also contain cancer that does not exclude them. Try then to pick a block that has the largest amount of PIN.

### **NOTE: This section is for the PARAFFIN BLOCK matrix.**

It is very possible that some (and occasionally all) of the paraffin blocks in the matrix will also have frozen tissue. When this happens indicate this in items 39a-e. On occasion, there may be some blocks that are only frozen (site dependent) also indicate this in the aforementioned data items.

=====

**28a. Paraffin Block Matrix a: Block number\*\*  
(Block with largest tumor nodule)**

Accession and Block # (i.e. SP-91-645-1A):

— — — - — — - — — — — — - — — — —

**29a. Paraffin Block Matrix: Most Prominent Histological Type of Invasive Cancer \*\* (Circle One)**

|                                     |                                                     |
|-------------------------------------|-----------------------------------------------------|
| Adenocarcinoma NOS (aka acinar)     | Undifferentiated non-small cell carcinoma           |
| Mucinous adenocarcinoma             | Signet ring adenocarcinoma      Lymphoma            |
| Transitional (not primary)          | Ductal adenocarcinoma      Neuroendocrine carcinoma |
| Small cell anaplastic carcinoma     | Sarcomatoid carcinoma      Basal cell carcinoma     |
| Squamous or adenosquamous carcinoma | Mesenchymal tumor (NOS)                             |
| PIN only                            | Unknown      Other (specify in comments)            |

**30a. Paraffin Block Matrix: Primary Gleason Grade\*\* (Circle One)**

|                    |                   |         |          |   |
|--------------------|-------------------|---------|----------|---|
| Gleason grade: 1   | 2                 | 3       | 4        | 5 |
| not adenocarcinoma | not primary tumor | Unknown | PIN only |   |

**31a. Paraffin Block Matrix: Secondary Gleason Grade\*\* (Circle One)**

|                    |                   |         |          |   |
|--------------------|-------------------|---------|----------|---|
| Gleason grade: 1   | 2                 | 3       | 4        | 5 |
| not adenocarcinoma | not primary tumor | Unknown | PIN only |   |

**32a. Paraffin Block Matrix: Size of Largest Individual Nodule of Invasive Cancer (in cm)**

— — . — cm (-1=unknown, 0.0 – 99.9 cm)

**(33a-39a) BLOCK ATTRIBUTES: Presence of:  
High Grade Prostatic Intraepithelial Neoplasia (PIN); Extracapsular Extension (ECE); Positive Surgical Margin (SM); Perineural Invasion (PN); Seminal Vesicle Invasion (SV); Angiolymphatic Invasion (AL); Type of Block(s) available (circle all that apply)**

|               |             |                     |           |           |           |             |
|---------------|-------------|---------------------|-----------|-----------|-----------|-------------|
| <b>PIN</b>    | <b>ECE</b>  | <b>SM</b>           | <b>PN</b> | <b>SV</b> | <b>AL</b> | <b>None</b> |
| Paraffin only | Frozen only | Paraffin and frozen |           |           |           |             |

**40a. Paraffin Block Matrix: block comments**

\_\_\_\_\_

\_\_\_\_\_

=====  
**28b. Paraffin Block Matrix b: Block number\*\* : (Block with largest amount of PIN, preferably in area independent of tumor, if possible. If no PIN then sample block with next largest amount of tumor.)**

Accession and Block # (i.e. SP-91-645-1A):

\_\_\_\_\_

**29b. Paraffin Block Matrix: Most Prominent Histological Type of Invasive Cancer \*\* (Circle One)**

|                                     |                                                     |
|-------------------------------------|-----------------------------------------------------|
| Adenocarcinoma NOS (aka acinar)     | Undifferentiated non-small cell carcinoma           |
| Mucinous adenocarcinoma             | Signet ring adenocarcinoma      Lymphoma            |
| Transitional (not primary)          | Ductal adenocarcinoma      Neuroendocrine carcinoma |
| Small cell anaplastic carcinoma     | Sarcomatoid carcinoma      Basal cell carcinoma     |
| Squamous or adenosquamous carcinoma | Mesenchymal tumor (NOS)                             |
| PIN only                            | Unknown      Other (specify in comments)            |

**30b. Paraffin Block Matrix: Primary Gleason Grade\*\* (Circle One)**

|                    |                   |         |          |   |
|--------------------|-------------------|---------|----------|---|
| Gleason grade: 1   | 2                 | 3       | 4        | 5 |
| not adenocarcinoma | not primary tumor | Unknown | PIN only |   |

**31b. Paraffin Block Matrix: Secondary Gleason Grade\*\* (Circle One)**

|                    |                   |         |          |   |
|--------------------|-------------------|---------|----------|---|
| Gleason grade: 1   | 2                 | 3       | 4        | 5 |
| not adenocarcinoma | not primary tumor | Unknown | PIN only |   |

**32b. Paraffin Block Matrix: Size of Largest Individual Nodule of Invasive Cancer (in cm)**

\_\_\_ . \_\_\_ cm (-1=unknown, 0.0 – 99.9 cm)

**(33b-39b) BLOCK ATTRIBUTES: Presence of: High Grade Prostatic Intraepithelial Neoplasia (PIN); Extracapsular Extension (ECE); Positive Surgical Margin (SM); Perineural Invasion (PN); Seminal Vesicle Invasion (SV); Angiolymphatic Invasion (AL); Type of Block(s) available (circle all that apply)**

|               |             |                     |           |           |           |             |
|---------------|-------------|---------------------|-----------|-----------|-----------|-------------|
| <b>PIN</b>    | <b>ECE</b>  | <b>SM</b>           | <b>PN</b> | <b>SV</b> | <b>AL</b> | <b>None</b> |
| Paraffin only | Frozen only | Paraffin and frozen |           |           |           |             |

**40b. Paraffin Block Matrix: block comments**

\_\_\_\_\_

=====

**28c. Paraffin Block Matrix c: Block number\*\* : (Block with seminal vesicle invasion. If no seminal vesicle invasion, include block with next largest tumor nodule).**

Accession and Block # (i.e. SP-91-645-1A):

— — — - — — - — — — — — — - — — — — —

**29c. Paraffin Block Matrix: Most Prominent Histological Type of Invasive Cancer \*\* (Circle One)**

- |                                     |                                                     |
|-------------------------------------|-----------------------------------------------------|
| Adenocarcinoma NOS (aka acinar)     | Undifferentiated non-small cell carcinoma           |
| Mucinous adenocarcinoma             | Signet ring adenocarcinoma      Lymphoma            |
| Transitional (not primary)          | Ductal adenocarcinoma      Neuroendocrine carcinoma |
| Small cell anaplastic carcinoma     | Sarcomatoid carcinoma      Basal cell carcinoma     |
| Squamous or adenosquamous carcinoma | Mesenchymal tumor (NOS)                             |
| PIN only                            | Unknown      Other (specify in comments)            |

**30c. Paraffin Block Matrix: Primary Gleason Grade\*\* (Circle One)**

- |                    |                   |         |          |   |
|--------------------|-------------------|---------|----------|---|
| Gleason grade: 1   | 2                 | 3       | 4        | 5 |
| not adenocarcinoma | not primary tumor | Unknown | PIN only |   |

**31c. Paraffin Block Matrix: Secondary Gleason Grade\*\* (Circle One)**

- |                    |                   |         |          |   |
|--------------------|-------------------|---------|----------|---|
| Gleason grade: 1   | 2                 | 3       | 4        | 5 |
| not adenocarcinoma | not primary tumor | Unknown | PIN only |   |

**32c. Paraffin Block Matrix: Size of Largest Individual Nodule of Invasive Cancer (in cm)**

— — . — cm (-1=unknown, 0.0 – 99.9 cm)

**(33c-39c) BLOCK ATTRIBUTES: Presence of: High Grade Prostatic Intraepithelial Neoplasia (PIN); Extracapsular Extension (ECE); Positive Surgical Margin (SM); Perineural Invasion (PN); Seminal Vesicle Invasion (SV); Angiolymphatic Invasion (AL); Type of Block(s) available (circle all that apply)**

|               |             |                     |           |           |           |             |
|---------------|-------------|---------------------|-----------|-----------|-----------|-------------|
| <b>PIN</b>    | <b>ECE</b>  | <b>SM</b>           | <b>PN</b> | <b>SV</b> | <b>AL</b> | <b>None</b> |
| Paraffin only | Frozen only | Paraffin and frozen |           |           |           |             |

**40c. Paraffin Block Matrix: block comments**

\_\_\_\_\_

=====

**28d. Paraffin Block Matrix d: Block number\*\*:** (Block with extracapsular extension (ECE) if present. If ECE is not present pick the block with the next largest amount of tumor).

Accession and Block # (i.e. SP-91-645-1A):

\_\_\_\_\_ - \_\_\_\_\_ - \_\_\_\_\_ - \_\_\_\_\_ - \_\_\_\_\_ - \_\_\_\_\_ - \_\_\_\_\_ - \_\_\_\_\_ - \_\_\_\_\_ - \_\_\_\_\_

**29d. Paraffin Block Matrix: Most Prominent Histological Type of Invasive Cancer \*\* (Circle One)**

- |                                     |                                                     |
|-------------------------------------|-----------------------------------------------------|
| Adenocarcinoma NOS (aka acinar)     | Undifferentiated non-small cell carcinoma           |
| Mucinous adenocarcinoma             | Signet ring adenocarcinoma      Lymphoma            |
| Transitional (not primary)          | Ductal adenocarcinoma      Neuroendocrine carcinoma |
| Small cell anaplastic carcinoma     | Sarcomatoid carcinoma      Basal cell carcinoma     |
| Squamous or adenosquamous carcinoma | Mesenchymal tumor (NOS)                             |
| PIN only                            | Unknown      Other (specify in comments)            |

**30d. Paraffin Block Matrix: Primary Gleason Grade\*\* (Circle One)**

- |                    |                   |         |          |   |
|--------------------|-------------------|---------|----------|---|
| Gleason grade: 1   | 2                 | 3       | 4        | 5 |
| not adenocarcinoma | not primary tumor | Unknown | PIN only |   |

**31d. Paraffin Block Matrix: Secondary Gleason Grade\*\* (Circle One)**

- |                    |                   |         |          |   |
|--------------------|-------------------|---------|----------|---|
| Gleason grade: 1   | 2                 | 3       | 4        | 5 |
| not adenocarcinoma | not primary tumor | Unknown | PIN only |   |

**32d. Paraffin Block Matrix: Size of Largest Individual Nodule of Invasive Cancer (in cm)**

\_\_\_ . \_\_\_ cm (-1=unknown, 0.0 – 99.9 cm)

**(33d-39d) BLOCK ATTRIBUTES: Presence of: High Grade Prostatic Intraepithelial Neoplasia (PIN); Extracapsular Extension (ECE); Positive Surgical Margin (SM); Perineural Invasion (PN); Seminal Vesicle Invasion (SV); Angiolymphatic Invasion (AL); Type of Block(s) available (circle all that apply)**

- |               |             |                     |           |           |           |             |
|---------------|-------------|---------------------|-----------|-----------|-----------|-------------|
| <b>PIN</b>    | <b>ECE</b>  | <b>SM</b>           | <b>PN</b> | <b>SV</b> | <b>AL</b> | <b>None</b> |
| Paraffin only | Frozen only | Paraffin and frozen |           |           |           |             |

**40d. Paraffin Block Matrix: block comments**

\_\_\_\_\_  
 \_\_\_\_\_  
 =====

**28e. Paraffin Block Matrix e: Block number\*\* : (Block with angiolymphatic invasion (AI). If AI is not present pick the block with the next largest amount of tumor).**

Accession and Block # (i.e. SP-91-645-1A):

— — — - — — - — — — — — - — — — —

**29e. Paraffin Block Matrix: Most Prominent Histological Type of Invasive Cancer \*\* (Circle One)**

|                                     |                                                     |
|-------------------------------------|-----------------------------------------------------|
| Adenocarcinoma NOS (aka acinar)     | Undifferentiated non-small cell carcinoma           |
| Mucinous adenocarcinoma             | Signet ring adenocarcinoma      Lymphoma            |
| Transitional (not primary)          | Ductal adenocarcinoma      Neuroendocrine carcinoma |
| Small cell anaplastic carcinoma     | Sarcomatoid carcinoma      Basal cell carcinoma     |
| Squamous or adenosquamous carcinoma | Mesenchymal tumor (NOS)                             |
| PIN only                            | Unknown      Other (specify in comments)            |

**30e. Paraffin Block Matrix: Primary Gleason Grade\*\* (Circle One)**

|                    |                   |         |          |   |
|--------------------|-------------------|---------|----------|---|
| Gleason grade: 1   | 2                 | 3       | 4        | 5 |
| not adenocarcinoma | not primary tumor | Unknown | PIN only |   |

**31e. Paraffin Block Matrix: Secondary Gleason Grade\*\* (Circle One)**

|                    |                   |         |          |   |
|--------------------|-------------------|---------|----------|---|
| Gleason grade: 1   | 2                 | 3       | 4        | 5 |
| not adenocarcinoma | not primary tumor | Unknown | PIN only |   |

**32e. Paraffin Block Matrix: Size of Largest Individual Nodule of Invasive Cancer (in cm)**

— — . — cm (-1=unknown, 0.0 – 99.9 cm)

**(33e-39e) BLOCK ATTRIBUTES: Presence of: High Grade Prostatic Intraepithelial Neoplasia (PIN); Extracapsular Extension (ECE); Positive Surgical Margin (SM); Perineural Invasion (PN); Seminal Vesicle Invasion (SV); Angiolymphatic Invasion (AL); Type of Block(s) available (circle all that apply)**

|               |             |                     |           |           |           |             |
|---------------|-------------|---------------------|-----------|-----------|-----------|-------------|
| <b>PIN</b>    | <b>ECE</b>  | <b>SM</b>           | <b>PN</b> | <b>SV</b> | <b>AL</b> | <b>None</b> |
| Paraffin only | Frozen only | Paraffin and frozen |           |           |           |             |

**40e. Paraffin Block Matrix: block comments**

\_\_\_\_\_  
\_\_\_\_\_

**NON-NEOPLASTIC PARAFFIN BLOCK'S:**

Try to include at least one block of normal prostate if possible (two blocks are preferred). If it is not possible to find a completely normal block then include one with minimal amounts of PIN or carcinoma. Seminal vesical is not considered a good normal block.

**41.Paraffin Prostatectomy Non-Neoplastic Block #1:**

Accession and Block # (i.e. SP-91-645-1A):

— — — - — — - — — — — — — - — — — — —

**42.Paraffin Prostatectomy Non-Neoplastic Block #2:**

Accession and Block # (i.e. SP-91-645-1A):

— — — - — — - — — — — — — - — — — — —

**43.General Comments on Paraffin Blocks:**

---

---

---

---



**FROZEN BLOCK MATRIX: (Items #44-56 are multiple entry fields. Up to 5 blocks preferred)**

**NOTE:** This section is for the FROZEN BLOCK matrix.

It is very possible that some (and occasionally all) of the frozen blocks in the matrix will also have paraffin tissue. When this happens indicate this in data element [Type of Block(s) available]. On occasion, there may be some blocks that are only frozen (site dependent) also indicate this in the aforementioned data items.

The Frozen block matrix section will allow the collection of block details on cases that meet the minimum requirements for inclusion into the Resource.

**NOTE:** Priorities for entering cases in prostatectomy neoplastic block matrix

- These should assist the teams in picking the highest value blocks for the CPCTR archives.
- Since the matrix can include up to 5 blocks here are the recommendations for selection criteria:
  - 1) The first block (block a) should include the largest nodule of tumor (as specified by the CDE)
  - 2) The third through fifth blocks (blocks c, d, e) should include seminal vesicle invasion, ECE or angiolymphatic invasion (in that order of preference) NOTE: If SV, ECE, AL do not occur, select the next largest area of tumor for 3 to 5 of the matrix.
  - 3) The second block (block b) should include the largest amount of PIN and preferred is an area of PIN that is independent of cancer (if that exists). If the blocks with PIN all also contain cancer that does not exclude them. Try then to pick a block that has the largest amount of PIN.

**NOTE: This section is for the FROZEN BLOCK matrix.**

**It is very possible** that some (and occasionally all) **of the frozen blocks in the matrix will also have paraffin tissue.** When this happens indicate this in items 55a-e). **On occasion**, there may be some blocks that are only frozen (site dependent) also indicate this in the aforementioned data items.

=====

**44a. Frozen Block Matrix a: Block number\*\*  
(Block with largest tumor nodule)**

Accession and Block # (i.e. SP-91-645-1A):

— — — - — — - — — — — — - — — — —

**45a. Frozen Block Matrix: Most Prominent Histological Type of Invasive Cancer \*\* (Circle One)**

- Adenocarcinoma NOS (aka acinar)                      Undifferentiated non-small cell carcinoma
- Mucinous adenocarcinoma                      Signet ring adenocarcinoma                      Lymphoma
- Transitional (not primary)                      Ductal adenocarcinoma                      Neuroendocrine carcinoma
- Small cell anaplastic carcinoma                      Sarcomatoid carcinoma                      Basal cell carcinoma
- Squamous or adenosquamous carcinoma                      Mesenchymal tumor (NOS)
- PIN only                      Unknown                      Other (specify in comments)

**46a. Frozen Block Matrix: Primary Gleason Grade\*\* (Circle One)**

- Gleason grade: 1                      2                      3                      4                      5
- not adenocarcinoma                      not primary tumor                      Unknown                      PIN only

**47a. Frozen Block Matrix: Secondary Gleason Grade\*\* (Circle One)**

- Gleason grade: 1                      2                      3                      4                      5
- not adenocarcinoma                      not primary tumor                      Unknown                      PIN only

**48a. Frozen Block Matrix: Size of Largest Individual Nodule of Invasive Cancer (in cm)**

— — . — cm (-1=unknown, 0.0 – 99.9 cm)

**(49a-55a) BLOCK ATTRIBUTES: Presence of:  
High Grade Prostatic Intraepithelial Neoplasia (PIN); Extracapsular Extension (ECE); Positive Surgical Margin (SM); Perineural Invasion (PN); Seminal Vesicle Invasion (SV); Angiolymphatic Invasion (AL); Type of Block(s) available (circle all that apply)**

|               |             |                     |           |           |           |             |
|---------------|-------------|---------------------|-----------|-----------|-----------|-------------|
| <b>PIN</b>    | <b>ECE</b>  | <b>SM</b>           | <b>PN</b> | <b>SV</b> | <b>AL</b> | <b>None</b> |
| Paraffin only | Frozen only | Paraffin and frozen |           |           |           |             |

**56a. Frozen Block Matrix: block comments**

\_\_\_\_\_  
\_\_\_\_\_

=====

**44b. Frozen Block Matrix b: Block number\*\* : (Block with largest amount of PIN, preferably in area independent of tumor, if possible. If no PIN then sample block with next largest amount of tumor.)**

Accession and Block # (i.e. SP-91-645-1A):

— — — - — — - — — — — — - — — — —

**45b. Frozen Block Matrix: Most Prominent Histological Type of Invasive Cancer \*\* (Circle One)**

Adenocarcinoma NOS (aka acinar)                      Undifferentiated non-small cell carcinoma  
Mucinous adenocarcinoma                      Signet ring adenocarcinoma                      Lymphoma  
Transitional (not primary)                      Ductal adenocarcinoma                      Neuroendocrine carcinoma  
Small cell anaplastic carcinoma                      Sarcomatoid carcinoma                      Basal cell carcinoma  
Squamous or adenosquamous carcinoma                      Mesenchymal tumor (NOS)  
PIN only                      Unknown                      Other (specify in comments)

**46b. Frozen Block Matrix: Primary Gleason Grade\*\* (Circle One)**

Gleason grade: 1                      2                      3                      4                      5  
not adenocarcinoma                      not primary tumor                      Unknown                      PIN only

**47b. Frozen Block Matrix: Secondary Gleason Grade\*\* (Circle One)**

Gleason grade: 1                      2                      3                      4                      5  
not adenocarcinoma                      not primary tumor                      Unknown                      PIN only

**48b. Frozen Block Matrix: Size of Largest Individual Nodule of Invasive Cancer (in cm)**

— — . — cm (-1=unknown, 0.0 – 99.9 cm)

**(49b-55b) BLOCK ATTRIBUTES: Presence of: High Grade Prostatic Intraepithelial Neoplasia (PIN); Extracapsular Extension (ECE); Positive Surgical Margin (SM); Perineural Invasion (PN); Seminal Vesicle Invasion (SV); Angiolymphatic Invasion (AL); Type of Block(s) available (circle all that apply)**

**PIN                      ECE                      SM                      PN                      SV                      AL                      None**  
**Paraffin only                      Frozen only                      Paraffin and frozen**

**56b. Frozen Block Matrix: block comments**

=====  
=====

**44c. Frozen Block Matrix c: Block number\*\*:** (Block with seminal vesicle invasion. If no seminal vesicle invasion, include block with next largest tumor nodule).

Accession and Block # (i.e. SP-91-645-1A):

— — — - — — - — — — — — - — — — —

**45c. Frozen Block Matrix: Most Prominent Histological Type of Invasive Cancer \*\* (Circle One)**

|                                     |                                                     |
|-------------------------------------|-----------------------------------------------------|
| Adenocarcinoma NOS (aka acinar)     | Undifferentiated non-small cell carcinoma           |
| Mucinous adenocarcinoma             | Signet ring adenocarcinoma      Lymphoma            |
| Transitional (not primary)          | Ductal adenocarcinoma      Neuroendocrine carcinoma |
| Small cell anaplastic carcinoma     | Sarcomatoid carcinoma      Basal cell carcinoma     |
| Squamous or adenosquamous carcinoma | Mesenchymal tumor (NOS)                             |
| PIN only                            | Unknown      Other (specify in comments)            |

**46c. Frozen Block Matrix: Primary Gleason Grade\*\* (Circle One)**

|                    |                   |         |          |   |
|--------------------|-------------------|---------|----------|---|
| Gleason grade: 1   | 2                 | 3       | 4        | 5 |
| not adenocarcinoma | not primary tumor | Unknown | PIN only |   |

**47c. Frozen Block Matrix: Secondary Gleason Grade\*\* (Circle One)**

|                    |                   |         |          |   |
|--------------------|-------------------|---------|----------|---|
| Gleason grade: 1   | 2                 | 3       | 4        | 5 |
| not adenocarcinoma | not primary tumor | Unknown | PIN only |   |

**48c. Frozen Block Matrix: Size of Largest Individual Nodule of Invasive Cancer (in cm)**

— — . — cm (-1=unknown, 0.0 – 99.9 cm)

**(49c-55c) BLOCK ATTRIBUTES: Presence of:**  
**High Grade Prostatic Intraepithelial Neoplasia (PIN); Extracapsular Extension (ECE); Positive Surgical Margin (SM); Perineural Invasion (PN); Seminal Vesicle Invasion (SV); Angiolymphatic Invasion (AL); Type of Block(s) available (circle all that apply)**

|               |             |                     |           |           |           |             |
|---------------|-------------|---------------------|-----------|-----------|-----------|-------------|
| <b>PIN</b>    | <b>ECE</b>  | <b>SM</b>           | <b>PN</b> | <b>SV</b> | <b>AL</b> | <b>None</b> |
| Paraffin only | Frozen only | Paraffin and frozen |           |           |           |             |

**56c. Frozen Block Matrix: block comments**

=====

**44d. Frozen Block Matrix d: Block number\*\* : (Block with extracapsular extension (ECE) if present. If ECE is not present pick the block with the next largest amount of tumor).**

Accession and Block # (i.e. SP-91-645-1A):

— — — - — — - — — — — — - — — — —

**45d. Frozen Block Matrix: Most Prominent Histological Type of Invasive Cancer \*\* (Circle One)**

- Adenocarcinoma NOS (aka acinar)                      Undifferentiated non-small cell carcinoma
- Mucinous adenocarcinoma                      Signet ring adenocarcinoma                      Lymphoma
- Transitional (not primary)                      Ductal adenocarcinoma                      Neuroendocrine carcinoma
- Small cell anaplastic carcinoma                      Sarcomatoid carcinoma                      Basal cell carcinoma
- Squamous or adenosquamous carcinoma                      Mesenchymal tumor (NOS)
- PIN only                      Unknown                      Other (specify in comments)

**46d. Frozen Block Matrix: Primary Gleason Grade\*\* (Circle One)**

- Gleason grade: 1                      2                      3                      4                      5
- not adenocarcinoma                      not primary tumor                      Unknown                      PIN only

**47d. Frozen Block Matrix: Secondary Gleason Grade\*\* (Circle One)**

- Gleason grade: 1                      2                      3                      4                      5
- not adenocarcinoma                      not primary tumor                      Unknown                      PIN only

**48d. Frozen Block Matrix: Size of Largest Individual Nodule of Invasive Cancer (in cm)**

— — . — cm (-1=unknown, 0.0 – 99.9 cm)

**(49d-55d) BLOCK ATTRIBUTES: Presence of: High Grade Prostatic Intraepithelial Neoplasia (PIN); Extracapsular Extension (ECE); Positive Surgical Margin (SM); Perineural Invasion (PN); Seminal Vesicle Invasion (SV); Angiolymphatic Invasion (AL); Type of Block(s) available (circle all that apply)**

- PIN                      ECE                      SM                      PN                      SV                      AL                      None**
- Paraffin only                      Frozen only                      Paraffin and frozen**

**56d. Frozen Block Matrix: block comments**

\_\_\_\_\_

=====

**44e. Frozen Block Matrix e: Block number\*\* : (Block with angiolymphatic invasion (AI). If AI is not present pick the block with the next largest amount of tumor).**

Accession and Block # (i.e. SP-91-645-1A):

— — — - — — - — — — — — - — — — —

**45e. Frozen Block Matrix: Most Prominent Histological Type of Invasive Cancer \*\* (Circle One)**

|                                     |                                                     |
|-------------------------------------|-----------------------------------------------------|
| Adenocarcinoma NOS (aka acinar)     | Undifferentiated non-small cell carcinoma           |
| Mucinous adenocarcinoma             | Signet ring adenocarcinoma      Lymphoma            |
| Transitional (not primary)          | Ductal adenocarcinoma      Neuroendocrine carcinoma |
| Small cell anaplastic carcinoma     | Sarcomatoid carcinoma      Basal cell carcinoma     |
| Squamous or adenosquamous carcinoma | Mesenchymal tumor (NOS)                             |
| PIN only                            | Unknown      Other (specify in comments)            |

**46e. Frozen Block Matrix: Primary Gleason Grade\*\* (Circle One)**

|                    |                   |         |          |   |
|--------------------|-------------------|---------|----------|---|
| Gleason grade: 1   | 2                 | 3       | 4        | 5 |
| not adenocarcinoma | not primary tumor | Unknown | PIN only |   |

**47e. Frozen Block Matrix: Secondary Gleason Grade\*\* (Circle One)**

|                    |                   |         |          |   |
|--------------------|-------------------|---------|----------|---|
| Gleason grade: 1   | 2                 | 3       | 4        | 5 |
| not adenocarcinoma | not primary tumor | Unknown | PIN only |   |

**48e. Frozen Block Matrix: Size of Largest Individual Nodule of Invasive Cancer (in cm)**

— — . — cm (-1=unknown, 0.0 – 99.9 cm)

**(49e-55e) BLOCK ATTRIBUTES: Presence of: High Grade Prostatic Intraepithelial Neoplasia (PIN); Extracapsular Extension (ECE); Positive Surgical Margin (SM); Perineural Invasion (PN); Seminal Vesicle Invasion (SV); Angiolymphatic Invasion (AL); Type of Block(s) available (circle all that apply)**

|               |             |                     |           |           |           |             |
|---------------|-------------|---------------------|-----------|-----------|-----------|-------------|
| <b>PIN</b>    | <b>ECE</b>  | <b>SM</b>           | <b>PN</b> | <b>SV</b> | <b>AL</b> | <b>None</b> |
| Paraffin only | Frozen only | Paraffin and frozen |           |           |           |             |

**56e. Frozen Block Matrix: block comments**

\_\_\_\_\_

\_\_\_\_\_

**NON-NEOPLASTIC FROZEN BLOCK'S:**

Try to include at least one block of normal prostate if possible (two blocks are preferred). If it is not possible to find a completely normal block then include one with minimal amounts of PIN or carcinoma. Seminal vesical is not considered a good normal block.

**57.Frozen Prostatectomy Non-Neoplastic Block #1:**

Accession and Block # (i.e. SP-91-645-1A):

\_\_\_ - \_\_\_ - \_\_\_ - \_\_\_ - \_\_\_ - \_\_\_ - \_\_\_ - \_\_\_ - \_\_\_ - \_\_\_ - \_\_\_ - \_\_\_ - \_\_\_ - \_\_\_ - \_\_\_ - \_\_\_

**58.Frozen Prostatectomy Non-Neoplastic Block #2:**

Accession and Block # (i.e. SP-91-645-1A):

\_\_\_ - \_\_\_ - \_\_\_ - \_\_\_ - \_\_\_ - \_\_\_ - \_\_\_ - \_\_\_ - \_\_\_ - \_\_\_ - \_\_\_ - \_\_\_ - \_\_\_ - \_\_\_ - \_\_\_ - \_\_\_

**59.Frozen Tissue: Warm Ischemic Time (in minutes) \*\***

\_\_\_ \_\_\_ \_\_\_ \_\_\_ \_\_\_ minutes (0 to 99; use -1 for unknown)

**60.General Comments on Frozen Blocks:**

\_\_\_\_\_  
\_\_\_\_\_  
\_\_\_\_\_  
\_\_\_\_\_

## HISTOLOGICAL CHARACTERISTICS OF PROSTATECTOMY

Enter the overall characteristics of the prostatectomy.

### 61. Date of Prostatectomy\*\*

\_\_ \_\_ / \_\_ \_\_ \_\_ \_\_ (MM/YYYY)

### 62. Is Residual Carcinoma Present at Prostatectomy? \*\*

(circle one)

Yes                      No                      HGPIN only                      Donor                      Unknown

### 63. Lobe Laterality

(circle one)

One - unspecified (laterality unknown)

One – right lobe only

One – left lobe only

Two – bilateral involvement

### 64. Most Prominent Histological Type of Invasive Cancer\*\* (Circle One)

Adenocarcinoma NOS (aka acinar)                      Undifferentiated non-small cell carcinoma

Mucinous adenocarcinoma                      Signet ring adenocarcinoma                      Lymphoma

Transitional (not primary)                      Ductal adenocarcinoma                      Neuroendocrine carcinoma

Small cell anaplastic carcinoma                      Sarcomatoid carcinoma                      Basal cell carcinoma

Squamous or adenosquamous carcinoma                      Mesenchymal tumor (NOS)

PIN only                      Unknown                      Other (specify in comments)

Comments: \_\_\_\_\_

\_\_\_\_\_

### 65.2<sup>nd</sup> Most Prominent Histological Type of Invasive Cancer (Circle One)

Adenocarcinoma NOS (aka acinar)                      Undifferentiated non-small cell carcinoma

Mucinous adenocarcinoma                      Signet ring adenocarcinoma                      Lymphoma

Transitional (not primary)                      Ductal adenocarcinoma                      Neuroendocrine carcinoma

Small cell anaplastic carcinoma                      Sarcomatoid carcinoma                      Basal cell carcinoma

Squamous or adenosquamous carcinoma                      Mesenchymal tumor (NOS)

PIN only                      Unknown                      Other (specify in comments)

Comments: \_\_\_\_\_

\_\_\_\_\_



**66. Prostatectomy: Primary Gleason Grade\*\* (Circle One)**

Gleason grade:      1                      2                      3                      4                      5  
not adenocarcinoma      not primary tumor      Unknown                      PIN only

**67. Prostatectomy: Secondary Gleason Grade\*\* (Circle One)**

Gleason grade:      1                      2                      3                      4                      5  
not adenocarcinoma      not primary tumor      Unknown                      PIN only

**68. Prostatectomy: Gleason Sum Score\*\* (Circle One)**

Gleason score 2                      Gleason score 3                      Gleason score 4  
Gleason score 5                      Gleason score 6                      Gleason score 7  
Gleason score 8                      Gleason score 9                      Gleason score 10  
not adenocarcinoma      not primary tumor                      unknown

**69. Percentage of Gleason 4/5 grade (in all of 6's and 7's):**

\_\_\_ \_\_\_ \_\_\_ % (0.x – 100 %, -1 = unknown)

**70. Size of Largest Individual Nodule of Invasive Cancer (in cm):**

\_\_\_ \_\_\_ \_\_\_ . \_\_\_ cm (0.x – 999, -1 = unknown)

**71. Percentage of Gland Occupied by Tumor: (Circle One)**

<5%                      5 to 25%                      >25%                      Unknown

**72. Multifocal Disease: (Circle One)**

Definition: Multifocal tumors MUST be separated by a certain distance (1-2 cm) so that the chance of artifactual sectioning is eliminated. The INDEX tumor is the primary case and the size is determined from that tumor.

Yes                      No                      Unknown

**73. Presence of High Grade Prostatic Intraepithelial Neoplasia: (Circle One)**

Yes - # of foci unknown                      Yes – 1 or 2 foci in region of tumor  
Yes – 1 or 2 foci away from tumor                      Yes – multifocal  
No                      Unknown

**74.Extraprostatic Extension/Extracapsular Invasion: (Circle One)**

Definition: Extraprostatic or Extracapsular extension seen in prostatectomy. Focal Extracapsular extension is defined as less than 0.8mm of ECE and established is >0.8mm. Multifocal is greater than 2 different foci of ECE.

None                  Focal                  Multifocal                  Established                  Unknown

**75.Surgical Margin Involvement: (Circle One)**

All surgical margins free of tumor                  Tumor focal at margin

Tumor widespread at margin                  Unknown

**76.Presence of Perineural Invasion: (Circle One)**

Yes                  No                  Unknown

**77.Presence of Seminal Vesicle Invasion: (Circle One)**

Yes                  No                  Unknown

**78.Presence of Angiolymphatic Invasion: (Circle One)**

Yes                  No                  Unknown

**79.General Comments Section for Prostatectomy:**

---

---

---

---

## REGIONAL LYMPH NODE STATUS AT THE TIME OF PROSTATECTOMY

Include the lymph node status at the time of the prostatectomy.

-If there is regional lymph node exploration prior or equal to the prostatectomy date, but after the initial diagnostic biopsy, then enter values here (in the Lymph Node section).

-Regional lymph nodes removed after the prostatectomy or Distant lymph nodes should be enter in the *METASTASIS MATRIX* section.

NOTE:

Regional lymph nodes are of the true pelvis. They are pelvic nodes below the bifurcation of the common iliac arteries and include: Pelvic (NOS), Hypogastric, Obturator, Iliac (internal, external, NOS), and Sacral (lateral, presacral, promontory, NOS) nodes.

Distant lymph nodes are outside the confines of the true pelvis and their involvement constitutes distant metastasis. They can be imaged using ultrasound, computed tomography, magnetic resonance imaging, or lymphangiography, and include: aortic (para-aortic, periaortic, lumbar), common iliac, inguinal, superficial inguinal (femoral), supraclavicular, cervical, scalene, and retroperitoneal (NOS) nodes.

### 80.Date of Regional Lymph Node resection

\_\_ \_\_ / \_\_ \_\_ \_\_ \_\_ (MM/YYYY)

### 81.Nodes Examined\*\*

Comments: 1) NOTE: -1 = "nodes examined, but number unknown"  
2) If no nodes are examined or do not know if any were examined, then enter "0".

# of examined nodes: \_\_ \_\_ (> 0; 99, -1 = "nodes examined, number unknown")

### 82.Nodes Positive\*\*

Comments: 1) NOTE: -1 = "some nodes are positive, but number unknown"  
2) If no nodes are positive or do not know if any were positive, then enter "0".

# of positive nodes: \_\_ \_\_ (> 0; 99, -1 = "nodes examined, number unknown")

### 83.Lymph Node Non-Neoplastic Block #1:

Accession and Block # (i.e. SP-91-645-1A):

\_\_ - \_\_ - \_\_ - - \_\_ - \_\_ - - \_\_ - \_\_ - \_\_ - \_\_ - - \_\_ - \_\_ - \_\_ - \_\_ -

### 84.General Comments Section for Lymph Nodes:

---

---

---

---



## RECURRENCE/METASTASIS STATUS:

The Recurrence/Metastasis Status data elements are separated into three categories:

- 1) **Biochemical recurrence** calls using the PSA recurrence algorithm developed by the CPCTR.
- 2) **Clinically verified Tissue recurrence/metastasis** for cases, which do not have blocks available for the Resource.
- 3) **Metastatic Tissue block matrix** for cases that have tissue available through the Resource from anatomical sites that show recurrence/metastasis of prostate cancer.

### BIOCHEMICAL RECURRENCE: (calculated values)

The biochemical recurrence calls are made using the PSA recurrence algorithm developed by the CPCTR. Further details on the algorithm used can be received by contacting the Resource.

NOTE: Data for #88-90 can be filled in manually from the IMS file for Institutional record. These fields DO NOT need to be captured locally.

#### 88. Biochemical Recurrence Status:

| Value              | Value Description                                |
|--------------------|--------------------------------------------------|
| Never Disease Free | Residual tumor present                           |
| No recurrence      | No recurrence                                    |
| PSA recurrence     | Recurred based on CPCTR PSA recurrence algorithm |
| Unknown            | Call cannot be determined using the algorithm    |

#### 89. Recurrence PSA value:

\_\_ \_\_ \_\_ \_\_ . \_\_ [>0.0; 9999.0, -1 (unknown)]

#### 90. Date of Biochemical Recurrence Status:

\_\_ \_\_ / \_\_ \_\_ \_\_ \_\_ (MM/YYYY)

**CLINICALLY VERIFIED TISSUE RECURRENCE/METASTASIS:**

These cases are those that do not have tissue blocks available, but are known clinically to have a recurrence/metastasis.

NOTE: Verification for clinical recurrence can be via radiology imaging, biopsy/resection, or surgery. However, a clinician's note indicating recurrence in a specific distant site would be sufficient. However this does not include notes of recurrence because of PSA (Biochemical), note must say "bone, liver, etc. mets".

**91.Tissue Recurrence/Metastasis: Distant site 1 (Circle One)**

|         |                       |                        |             |
|---------|-----------------------|------------------------|-------------|
| Bladder | Blood                 | Bone                   | Bone Marrow |
| Brain   | Carcinomatosis        | CNS                    | Generalized |
| Liver   | Local extension       | Lung                   | Peritoneum  |
| Rectum  | Lymph Nodes (Distant) | Lymph Nodes (Regional) |             |
| Skin    | None                  | Other (NOS)            | Unknown     |

**92.Date of Tissue Recurrence/Metastasis: Distant site 1**

\_\_ \_\_ / \_\_ \_\_ \_\_ \_\_ (MM/YYYY)

=====

**93.Tissue Recurrence/Metastasis: Distant site 2 (Circle One)**

|         |                       |                        |             |
|---------|-----------------------|------------------------|-------------|
| Bladder | Blood                 | Bone                   | Bone Marrow |
| Brain   | Carcinomatosis        | CNS                    | Generalized |
| Liver   | Local extension       | Lung                   | Peritoneum  |
| Rectum  | Lymph Nodes (Distant) | Lymph Nodes (Regional) |             |
| Skin    | None                  | Other (NOS)            | Unknown     |

**94.Date of Tissue Recurrence/Metastasis: Distant site 2**

\_\_ \_\_ / \_\_ \_\_ \_\_ \_\_ (MM/YYYY)

=====

**95. Tissue Recurrence/Metastasis: Distant site 3 (Circle One)**

|         |                       |                        |             |
|---------|-----------------------|------------------------|-------------|
| Bladder | Blood                 | Bone                   | Bone Marrow |
| Brain   | Carcinomatosis        | CNS                    | Generalized |
| Liver   | Local extension       | Lung                   | Peritoneum  |
| Rectum  | Lymph Nodes (Distant) | Lymph Nodes (Regional) |             |
| Skin    | None                  | Other (NOS)            | Unknown     |

**96. Date of Tissue Recurrence/Metastasis: Distant site 3**

\_\_ \_\_ / \_\_ \_\_ \_\_ \_\_ (MM/YYYY)

=====

**97. General Comments for Clinically Verified Tissue Recurrence/Metastasis:**

---

---

---

---

**METASTATIC TISSUE BLOCK MATRIX: (Items #98-108 are multiple entry fields):**

- Enter as many blocks available (Three blocks are preferred).
- If multiple metastatic sites are present, then enter at least 1 block from each site.
- Try to include at least one block of normal tissue from the same site if possible. If it is not possible to find a completely normal block then include one with minimal amounts of carcinoma.
- The first 3 metastatic blocks matrix are included as *Blocks a, b, c.* (Print additional forms if necessary)

**98a. Metastatic Block Matrix #1: Block number**

Accession and Block # (i.e. SP-91-645-1A):

\_\_\_\_\_ - \_\_\_\_\_ - \_\_\_\_\_ - \_\_\_\_\_ - \_\_\_\_\_ - \_\_\_\_\_ - \_\_\_\_\_ - \_\_\_\_\_ - \_\_\_\_\_ - \_\_\_\_\_

**99a. Metastatic Block Matrix #1: Specimen source (Circle One)**

|               |                  |                             |
|---------------|------------------|-----------------------------|
| <b>Biopsy</b> | <b>Resection</b> | <b>Fine Needle Aspirate</b> |
| <b>Other</b>  | <b>Unknown</b>   |                             |

**100a. Metastatic Block Matrix #1: Tissue Type (Circle One)**

|                |                              |                               |                    |
|----------------|------------------------------|-------------------------------|--------------------|
| <b>Bladder</b> | <b>Blood</b>                 | <b>Bone</b>                   | <b>Bone Marrow</b> |
| <b>Brain</b>   | <b>Carcinomatosis</b>        | <b>CNS</b>                    | <b>Generalized</b> |
| <b>Liver</b>   | <b>Local extension</b>       | <b>Lung</b>                   | <b>Peritoneum</b>  |
| <b>Rectum</b>  | <b>Lymph Nodes (Distant)</b> | <b>Lymph Nodes (Regional)</b> |                    |
| <b>Skin</b>    | <b>None</b>                  | <b>Other (NOS)</b>            | <b>Unknown</b>     |

**101a. Metastatic Block Matrix #1: Most Prominent Histological Type of Invasive Cancer (Circle One)**

|                                     |                                                     |
|-------------------------------------|-----------------------------------------------------|
| Adenocarcinoma NOS (aka acinar)     | Undifferentiated non-small cell carcinoma           |
| Mucinous adenocarcinoma             | Signet ring adenocarcinoma      Lymphoma            |
| Transitional (not primary)          | Ductal adenocarcinoma      Neuroendocrine carcinoma |
| Small cell anaplastic carcinoma     | Sarcomatoid carcinoma      Basal cell carcinoma     |
| Squamous or adenosquamous carcinoma | Mesenchymal tumor (NOS)                             |
| PIN only                            | Unknown      Other (specify in comments)            |

Comments: \_\_\_\_\_  
 \_\_\_\_\_



**102a. Metastatic Block Matrix #1: Size of Largest Individual Nodule of Invasive Cancer (in cm)**

\_\_ \_\_ \_\_ . \_\_ cm (0.x – 999, -1 = unknown)

**103a. Metastatic Block Matrix #1: Percentage of Tissue Occupied by Tumor (Circle One)**

**<5%                      5 to 25%                      >25%                      Unknown**

**104a. Metastatic Block Matrix #1: Presence of Therapy effects (Circle One)**

**Yes                      No                      Unknown**

**105a. Metastatic Block Matrix #1: Non-Neoplastic Block number:**

Accession and Block # (i.e. SP-91-645-1A):

\_\_ \_\_ \_\_ - \_\_ \_\_ - \_\_ \_\_ \_\_ \_\_ \_\_ - \_\_ \_\_ \_\_ \_\_

**106a. Metastatic Block Matrix #1: Type of Block(s) available (Circle One)**

**Paraffin only   Frozen only                      Paraffin and frozen**

**107a. Date of Metastatic Block Matrix #1:**

\_\_ \_\_ / \_\_ \_\_ \_\_ \_\_ (MM/YYYY)

**108a. General Comments Section for Metastatic Block Matrix #1:**

---



---



---



---



---

=====

**98b. Metastatic Block Matrix #2: Block number**

Accession and Block # (i.e. SP-91-645-1A):

\_\_\_\_\_ - \_\_\_\_\_ - \_\_\_\_\_

**99b. Metastatic Block Matrix #2: Specimen source (Circle One)**

**Biopsy**                         **Resection**                         **Fine Needle Aspirate**  
**Other**                                 **Unknown**

**100b. Metastatic Block Matrix #2: Tissue Type (Circle One)**

|         |                       |             |                        |
|---------|-----------------------|-------------|------------------------|
| Bladder | Blood                 | Bone        | Bone Marrow            |
| Brain   | Carcinomatosis        | CNS         | Generalized            |
| Liver   | Local extension       | Lung        | Peritoneum             |
| Rectum  | Lymph Nodes (Distant) |             | Lymph Nodes (Regional) |
| Skin    | None                  | Other (NOS) | Unknown                |

**101b. Metastatic Block Matrix #2: Most Prominent Histological Type of Invasive Cancer (Circle One)**

Adenocarcinoma NOS (aka acinar)                         Undifferentiated non-small cell carcinoma

Mucinous adenocarcinoma                         Signet ring adenocarcinoma                         Lymphoma

Transitional (not primary)                         Ductal adenocarcinoma                         Neuroendocrine carcinoma

Small cell anaplastic carcinoma                         Sarcomatoid carcinoma                         Basal cell carcinoma

Squamous or adenosquamous carcinoma                         Mesenchymal tumor (NOS)

PIN only                         Unknown                         Other (specify in comments)

Comments: \_\_\_\_\_

---

**102b. Metastatic Block Matrix #2: Size of Largest Individual Nodule of Invasive Cancer (in cm)**

\_\_\_\_\_ . \_\_\_\_\_ cm (0.x – 999, -1 = unknown)

**103b. Metastatic Block Matrix #2: Percentage of Tissue Occupied by Tumor (Circle One)**

<5%      5 to 25%      >25%      Unknown

**104b. Metastatic Block Matrix #2: Presence of Therapy effects (Circle One)**

Yes      No      Unknown

**105b. Metastatic Block Matrix #2: Non-Neoplastic Block number:**

Accession and Block # (i.e. SP-91-645-1A):

— — — - — — - — — — — — - — — — — —

**106b. Metastatic Block Matrix #2: Type of Block(s) available (Circle One)**

Paraffin only   Frozen only      Paraffin and frozen

**107b. Date of Metastatic Block Matrix #2:**

— — / — — — — (MM/YYYY)

**108b. General Comments Section for Metastatic Block Matrix #2:**

---

---

---

---

---

=====  
**98c. Metastatic Block Matrix #3: Block number**

Accession and Block # (i.e. SP-91-645-1A):

\_\_\_\_\_ - \_\_\_\_\_ - \_\_\_\_\_ - \_\_\_\_\_ - \_\_\_\_\_

**99c. Metastatic Block Matrix #3: Specimen source (Circle One)**

**Biopsy                  Resection                  Fine Needle Aspirate**  
**Other                  Unknown**

**100c. Metastatic Block Matrix #3: Tissue Type (Circle One)**

**Bladder                  Blood                  Bone                  Bone Marrow**  
**Brain                  Carcinomatosis                  CNS                  Generalized**  
**Liver                  Local extension                  Lung                  Peritoneum**  
**Rectum                  Lymph Nodes (Distant)                  Lymph Nodes (Regional)**  
**Skin                  None                  Other (NOS)                  Unknown**

**101c. Metastatic Block Matrix #3: Most Prominent Histological Type of Invasive Cancer (Circle One)**

Adenocarcinoma NOS (aka acinar)                  Undifferentiated non-small cell carcinoma  
Mucinous adenocarcinoma                  Signet ring adenocarcinoma                  Lymphoma  
Transitional (not primary)                  Ductal adenocarcinoma                  Neuroendocrine carcinoma  
Small cell anaplastic carcinoma                  Sarcomatoid carcinoma                  Basal cell carcinoma  
Squamous or adenosquamous carcinoma                  Mesenchymal tumor (NOS)  
PIN only                  Unknown                  Other (specify in comments)

Comments: \_\_\_\_\_  
\_\_\_\_\_

**102c. Metastatic Block Matrix #3: Size of Largest Individual Nodule of Invasive Cancer (in cm)**

\_\_\_\_\_ . \_\_\_\_ cm (0.x – 999, -1 = unknown)

**103c. Metastatic Block Matrix #3: Percentage of Tissue Occupied by Tumor (Circle One)**

**<5%                      5 to 25%                      >25%                      Unknown**

**104c. Metastatic Block Matrix #3: Presence of Therapy effects (Circle One)**

**Yes                      No                      Unknown**

**105c. Metastatic Block Matrix #3: Non-Neoplastic Block number:**

Accession and Block # (i.e. SP-91-645-1A):

\_\_\_\_\_ - \_\_\_\_\_ - \_\_\_\_\_ - \_\_\_\_\_ - \_\_\_\_\_ - \_\_\_\_\_ - \_\_\_\_\_ - \_\_\_\_\_

**106c. Metastatic Block Matrix #3: Type of Block(s) available (Circle One)**

**Paraffin only    Frozen only                      Paraffin and frozen**

**107c. Date of Metastatic Block Matrix #3:**

\_\_\_ \_\_\_ / \_\_\_ \_\_\_ \_\_\_ \_\_\_ (MM/YYYY)

**108c. General Comments Section for Metastatic Block Matrix #3:**

---

---

---

---

---

# STAGING

Pathological and Clinical Staging will be based on using the AJCC Manual for Staging of Cancer, 5th Ed.

## PATHOLOGICAL STAGING:

### 109. pT Stage\*\* (Circle One)

**pT0**            **pT1**            **pT1a**            **pT1b**            **pT1c**  
**pT2**            **pT2a**            **pT2b**            **pT3**            **pT3a**            **pT3b**  
**pT4**            **pTX**

| Value | Value Description                                                         |
|-------|---------------------------------------------------------------------------|
| pT0   | No evidence of primary tumor                                              |
| pT1   | Clinically inapparent tumor not palpable nor visible by imaging           |
| pT1a  | Tumor incidental histologic finding in 5% or less of tissue resected      |
| pT1b  | Tumor incidental histologic finding in more than 5% of tissue resected    |
| pT1c  | Tumor identified by needle biopsy (e.g., because of elevated PSA)         |
| pT2   | Tumor confined within prostate*                                           |
| pT2a  | Tumor involves 1 lobe                                                     |
| pT2b  | Tumor involves both lobes                                                 |
| pT3   | Tumor extends through the prostatic capsule**                             |
| pT3a  | Extracapsular extension (unilateral or bilateral)                         |
| pT3b  | Tumor invades seminal vesicle(s)                                          |
| pT4   | Tumor is fixed or invades adjacent structures other than seminal vesicles |
| pTX   | Primary tumor cannot be assessed                                          |

### 110. pN Stage\*\* (Circle One)

**pN0**            **pN1**            **pNX**

| Value | Value Description                          |
|-------|--------------------------------------------|
| pN0   | No regional lymph node metastasis          |
| pN1   | Metastasis in regional lymph node or nodes |
| pNX   | Regional lymph nodes cannot be assessed    |

### 111. pM Stage\*\* (Circle One)

**pM0**            **pM1**            **pM1a**            **pM1b**            **pM1c**            **pMX**

| Value | Value Description                     |
|-------|---------------------------------------|
| pM0   | No distant metastasis                 |
| pM1   | Distant metastasis                    |
| pM1a  | Non-regional lymph node(s)            |
| pM1b  | Bone(s)                               |
| pM1c  | Other site(s)*                        |
| pMX   | Distant metastasis cannot be assessed |

**CLINICAL STAGING:**

**112. cT Stage (Circle One)**

**T0**                    **T1**                    **T1a**                    **T1b**                    **T1c**

**T2**                    **T2a**                    **T2b**                    **T3**                    **T3a**                    **T3b**

**T4**                    **TX**

| Value | Value Description                                                         |
|-------|---------------------------------------------------------------------------|
| T0    | No evidence of primary tumor                                              |
| T1    | Clinically inapparent tumor not palpable nor visible by imaging           |
| T1a   | Tumor incidental histologic finding in 5% or less of tissue resected      |
| T1b   | Tumor incidental histologic finding in more than 5% of tissue resected    |
| T1c   | Tumor identified by needle biopsy (e.g., because of elevated PSA)         |
| T2    | Tumor confined within prostate*                                           |
| T2a   | Tumor involves 1 lobe                                                     |
| T2b   | Tumor involves both lobes                                                 |
| T3    | Tumor extends through the prostatic capsule**                             |
| T3a   | Extracapsular extension (unilateral or bilateral)                         |
| T3b   | Tumor invades seminal vesicle(s)                                          |
| T4    | Tumor is fixed or invades adjacent structures other than seminal vesicles |
| TX    | Primary tumor cannot be assessed                                          |

**113. cN Stage (Circle One)**

**N0**                    **N1**                    **NX**

| Value | Value Description                          |
|-------|--------------------------------------------|
| N0    | No regional lymph node metastasis          |
| N1    | Metastasis in regional lymph node or nodes |
| NX    | Regional lymph nodes cannot be assessed    |

**114. cM Stage (Circle One)**

**M0**                    **M1**                    **M1a**                    **M1b**                    **M1c**                    **MX**

| Value | Value Description                     |
|-------|---------------------------------------|
| M0    | No distant metastasis                 |
| M1    | Distant metastasis                    |
| M1a   | Non-regional lymph node(s)            |
| M1b   | Bone(s)                               |
| M1c   | Other site(s) *                       |
| MX    | Distant metastasis cannot be assessed |

**115. General Staging Comments:** \_\_\_\_\_

## VITAL STATUS/FOLLOW UP DATE

Record the patient's vital status and most recent follow up date.

**NOTE:** If an attempt was made to follow up the patient history but no new data was collected since the last follow up, make a note in the *final comments* that an attempt was made on a specific date, and that the case may be "lost to follow up".

### Vital Status/Follow Up:

**116. Date Last Known Alive\*:**

\_\_ \_\_ / \_\_ \_\_ \_\_ \_\_ (MM/YYYY)

**117. Date of Death:**

\_\_ \_\_ / \_\_ \_\_ \_\_ \_\_ (MM/YYYY)

**118. Vital Status\*:** (Circle One)

Alive

Dead

Lost to follow up

Dead with Warm Autopsy

**119. Final Comments:**

---

---

---

---

---



**THERAPY MATRIX** (Items #120-123 are multiple entry fields): Record the patient's treatment history.

- Enter as many treatment information available.
- If therapy event was part of initial planned treatment, please mark appropriate data field.
- The data fields for the first 3 therapy events are included as *Therapy matrix a, b, c*. (Print additional forms if necessary)
- "*Per Initial Treatment Plan*" is defined as: If there is no treatment plan, established protocol, or management guidelines, and consultation with a physician advisor is not possible, use the principle: 'initial treatment must begin within four months of the date of initial diagnosis.

**120a. Therapy matrix: Type of Therapy: (Circle One)**

Brachytherapy                      Chemotherapy                      Cryotherapy                      Watchful waiting  
 External Beam Radiation                      Radiation Therapy, NOS                      Immunotherapy  
 Hormone Therapy, NOS                      Medical hormone suppression  
 Alternative Therapy (specify in comments)                      Surgical orchiectomy  
 Experimental (specify in comments)

**121a. Therapy matrix: Therapy Start Date**

\_\_ \_\_ / \_\_ \_\_ \_\_ \_\_ (MM/YYYY)

**122a. Therapy matrix: Per Initial Treatment Plan? \*\* (Circle One)**

Yes                      No                      Unknown

**123a. Therapy Matrix Comments:**

\_\_\_\_\_  
 \_\_\_\_\_  
 \_\_\_\_\_  
 =====

**120b. Therapy matrix: Type of Therapy: (Circle One)**

Brachytherapy                      Chemotherapy                      Cryotherapy                      Watchful waiting  
 External Beam Radiation                      Radiation Therapy, NOS                      Immunotherapy  
 Hormone Therapy, NOS                      Medical hormone suppression  
 Alternative Therapy (specify in comments)                      Surgical orchiectomy  
 Experimental (specify in comments)

**121b. Therapy matrix: Therapy Start Date**

\_\_ \_\_ / \_\_ \_\_ \_\_ \_\_ (MM/YYYY)

**122b. Therapy matrix: Per Initial Treatment Plan? \*\* (Circle One)**

(If there is no treatment plan, established protocol, or management guidelines, and consultation with a physician advisor is not possible, use the principle: 'initial treatment must begin within four months of the date of initial diagnosis.)

Yes                      No                      Unknown

**123b. Therapy Matrix Comments:**

---

---

---

=====  
**120c. Therapy matrix: Type of Therapy: (Circle One)**

Brachytherapy              Chemotherapy              Cryotherapy              Watchful waiting  
External Beam Radiation      Radiation Therapy, NOS              Immunotherapy  
Hormone Therapy, NOS              Medical hormone suppression  
Alternative Therapy (specify in comments)      Surgical orchiectomy  
Experimental (specify in comments)

**121c. Therapy matrix: Therapy Start Date**

\_\_ \_\_ / \_\_ \_\_ \_\_ \_\_ (MM/YYYY)

**122c. Therapy matrix: Per Initial Treatment Plan? \*\* (Circle One)**

Yes                      No                      Unknown

**123c. Therapy Matrix Comments:**

---

---

**Additional overall Therapy comments:**

**124. Comments on Therapy Response:**

---

---

**125. General Overall Comments on Therapy:**

---

---

**NEEDLE BIOPSY BLOCK MATRIX: [Items #126-134 are multiple entry fields. Up to 5 blocks preferred (blocks a-e)]**

- Here are the recommended criteria for needle biopsy:

- 1) Can include one block or more (up to 5)
- 2) Must at least include one neoplastic block and classify according to the needle biopsy matrix.

NOTE: for biopsy-only cases, it is a requirement to enter the "subsequent prostatectomy" field in the biopsy attribute section. **"Biopsy-Only" cases** are cases due to advance disease or other reasons that did NOT lead to a prostatectomy.

**126a. Biopsy Matrix: Block number**

Accession and Block # (i.e. SP-91-645-1A):

\_\_\_ - \_\_\_ - \_\_\_ - \_\_\_ - \_\_\_ - \_\_\_ - \_\_\_ - \_\_\_ - \_\_\_ - \_\_\_ - \_\_\_ - \_\_\_ - \_\_\_ - \_\_\_ - \_\_\_ - \_\_\_

**127a. Biopsy Matrix: Most Prominent Histological Type of Invasive Cancer: (Circle One)**

- |                                     |                                                     |
|-------------------------------------|-----------------------------------------------------|
| Adenocarcinoma NOS (aka acinar)     | Undifferentiated non-small cell carcinoma           |
| Mucinous adenocarcinoma             | Signet ring adenocarcinoma      Lymphoma            |
| Transitional (not primary)          | Ductal adenocarcinoma      Neuroendocrine carcinoma |
| Small cell anaplastic carcinoma     | Sarcomatoid carcinoma      Basal cell carcinoma     |
| Squamous or adenosquamous carcinoma | Mesenchymal tumor (NOS)                             |
| PIN only                            | Unknown      Other (specify in comments)            |

**128a. Biopsy Matrix: Primary Gleason Grade: (Circle One)**

- |                    |                   |         |          |   |
|--------------------|-------------------|---------|----------|---|
| Gleason grade: 1   | 2                 | 3       | 4        | 5 |
| not adenocarcinoma | not primary tumor | Unknown | PIN only |   |

**129a. Biopsy Matrix: Secondary Gleason Grade: (Circle One)**

- |                    |                   |         |          |   |
|--------------------|-------------------|---------|----------|---|
| Gleason grade: 1   | 2                 | 3       | 4        | 5 |
| not adenocarcinoma | not primary tumor | Unknown | PIN only |   |

**130a. Biopsy Matrix: Size of Largest Individual Nodule of Invasive Cancer (in cm)**

\_\_\_ \_\_\_ . \_\_\_ cm (-1=unknown, 0.0 – 99.9 cm)

**(131a-133a) BIOPSY BLOCK ATTRIBUTES: Presence of:  
High Grade Prostatic Intraepithelial Neoplasia (PIN); Perineural Invasion  
(PN); Angiolymphatic Invasion (AL). (circle all that apply)**

**PIN                      PN                      AL                      None**

**134a. Biopsy Matrix: block comments**

---



---



---



---

=====

**126b. Biopsy Matrix: Block number**

Accession and Block # (i.e. SP-91-645-1A):

— — — — - — — — - — — — — — — — - — — — — —

**127b. Biopsy Matrix: Most Prominent Histological Type of Invasive Cancer:  
(Circle One)**

- Adenocarcinoma NOS (aka acinar)                      Undifferentiated non-small cell carcinoma
- Mucinous adenocarcinoma                      Signet ring adenocarcinoma                      Lymphoma
- Transitional (not primary)                      Ductal adenocarcinoma                      Neuroendocrine carcinoma
- Small cell anaplastic carcinoma                      Sarcomatoid carcinoma                      Basal cell carcinoma
- Squamous or adenosquamous carcinoma                      Mesenchymal tumor (NOS)
- PIN only                      Unknown                      Other (specify in comments)

**128b. Biopsy Matrix: Primary Gleason Grade: (Circle One)**

- Gleason grade: 1                      2                      3                      4                      5
- not adenocarcinoma                      not primary tumor                      Unknown                      PIN only

**129b. Biopsy Matrix: Secondary Gleason Grade: (Circle One)**

- Gleason grade: 1                      2                      3                      4                      5
- not adenocarcinoma                      not primary tumor                      Unknown                      PIN only

**130b. Biopsy Matrix: Size of Largest Individual Nodule of Invasive Cancer (in cm)**

\_\_\_ \_\_\_ . \_\_\_ cm (-1=unknown, 0.0 – 99.9 cm)

**(131b-133b) BIOPSY BLOCK ATTRIBUTES: Presence of: High Grade Prostatic Intraepithelial Neoplasia (PIN); Perineural Invasion (PN); Angiolymphatic Invasion (AL). (circle all that apply)**

**PIN                  PN                  AL                  None**

**134b. Biopsy Matrix: block comments**

---

---

---

---

=====
**126c. Biopsy Matrix: Block number**

Accession and Block # (i.e. SP-91-645-1A):

\_\_\_ - \_\_\_ - \_\_\_ - \_\_\_ - \_\_\_ - \_\_\_ - \_\_\_ - \_\_\_ - \_\_\_ - \_\_\_ - \_\_\_ - \_\_\_

**127c. Biopsy Matrix: Most Prominent Histological Type of Invasive Cancer: (Circle One)**

- Adenocarcinoma NOS (aka acinar)                  Undifferentiated non-small cell carcinoma
- Mucinous adenocarcinoma                  Signet ring adenocarcinoma                  Lymphoma
- Transitional (not primary)                  Ductal adenocarcinoma                  Neuroendocrine carcinoma
- Small cell anaplastic carcinoma                  Sarcomatoid carcinoma                  Basal cell carcinoma
- Squamous or adenosquamous carcinoma                  Mesenchymal tumor (NOS)
- PIN only                  Unknown                  Other (specify in comments)

**128c. Biopsy Matrix: Primary Gleason Grade: (Circle One)**

Gleason grade: 1                  2                  3                  4                  5  
not adenocarcinoma                  not primary tumor                  Unknown                  PIN only

**129c. Biopsy Matrix: Secondary Gleason Grade: (Circle One)**

Gleason grade: 1                      2                      3                      4                      5  
not adenocarcinoma                      not primary tumor                      Unknown                      PIN only

**130c. Biopsy Matrix: Size of Largest Individual Nodule of Invasive Cancer (in cm)**

\_\_\_ \_\_\_ . \_\_\_ cm (-1=unknown, 0.0 – 99.9 cm)

**(131c-133c) BIOPSY BLOCK ATTRIBUTES: Presence of: High Grade Prostatic Intraepithelial Neoplasia (PIN); Perineural Invasion (PN); Angiolymphatic Invasion (AL). (circle all that apply)**

**PIN                      PN                      AL                      None**

**134c. Biopsy Matrix: block comments**

---

---

---

---

===== **126d. Biopsy Matrix: Block number**

Accession and Block # (i.e. SP-91-645-1A):

\_\_\_ - \_\_\_ - \_\_\_ - \_\_\_ - \_\_\_ - \_\_\_ - \_\_\_ - \_\_\_ - \_\_\_ - \_\_\_

**127d. Biopsy Matrix: Most Prominent Histological Type of Invasive Cancer: (Circle One)**

Adenocarcinoma NOS (aka acinar)                      Undifferentiated non-small cell carcinoma  
Mucinous adenocarcinoma                      Signet ring adenocarcinoma                      Lymphoma  
Transitional (not primary)                      Ductal adenocarcinoma                      Neuroendocrine carcinoma  
Small cell anaplastic carcinoma                      Sarcomatoid carcinoma                      Basal cell carcinoma  
Squamous or adenosquamous carcinoma                      Mesenchymal tumor (NOS)  
PIN only                      Unknown                      Other (specify in comments)

**128d. Biopsy Matrix: Primary Gleason Grade: (Circle One)**

|                    |                   |         |          |   |
|--------------------|-------------------|---------|----------|---|
| Gleason grade: 1   | 2                 | 3       | 4        | 5 |
| not adenocarcinoma | not primary tumor | Unknown | PIN only |   |

**129d. Biopsy Matrix: Secondary Gleason Grade: (Circle One)**

|                    |                   |         |          |   |
|--------------------|-------------------|---------|----------|---|
| Gleason grade: 1   | 2                 | 3       | 4        | 5 |
| not adenocarcinoma | not primary tumor | Unknown | PIN only |   |

**130d. Biopsy Matrix: Size of Largest Individual Nodule of Invasive Cancer (in cm)**

\_\_ \_\_ . \_\_ cm (-1=unknown, 0.0 – 99.9 cm)

**(131d-133d) BIOPSY BLOCK ATTRIBUTES: Presence of: High Grade Prostatic Intraepithelial Neoplasia (PIN); Perineural Invasion (PN); Angiolymphatic Invasion (AL). (circle all that apply)**

**PIN          PN          AL          None**

**134d. Biopsy Matrix: block comments**

---

---

---

---

=====

**126e. Biopsy Matrix: Block number**

Accession and Block # (i.e. SP-91-645-1A):

— — — - — — - — — — — — — - — — — —

**127e. Biopsy Matrix: Most Prominent Histological Type of Invasive Cancer: (Circle One)**

- Adenocarcinoma NOS (aka acinar)                      Undifferentiated non-small cell carcinoma
- Mucinous adenocarcinoma                      Signet ring adenocarcinoma                      Lymphoma
- Transitional (not primary)                      Ductal adenocarcinoma                      Neuroendocrine carcinoma
- Small cell anaplastic carcinoma                      Sarcomatoid carcinoma                      Basal cell carcinoma
- Squamous or adenosquamous carcinoma                      Mesenchymal tumor (NOS)
- PIN only                      Unknown                      Other (specify in comments)

**128e. Biopsy Matrix: Primary Gleason Grade: (Circle One)**

- Gleason grade: 1                      2                      3                      4                      5
- not adenocarcinoma                      not primary tumor                      Unknown                      PIN only

**129e. Biopsy Matrix: Secondary Gleason Grade: (Circle One)**

- Gleason grade: 1                      2                      3                      4                      5
- not adenocarcinoma                      not primary tumor                      Unknown                      PIN only

**130e. Biopsy Matrix: Size of Largest Individual Nodule of Invasive Cancer (in cm)**

— — . — cm (-1=unknown, 0.0 – 99.9 cm)

**(131e-133e) BIOPSY BLOCK ATTRIBUTES: Presence of: High Grade Prostatic Intraepithelial Neoplasia (PIN); Perineural Invasion (PN); Angiolymphatic Invasion (AL). (circle all that apply)**

- PIN                      PN                      AL                      None**

**134e. Biopsy Matrix: block comments**

---



---



---



---



**OVERALL NEEDLE BIOPSY ATTRIBUTES:**

- Enter the overall characteristics of the biopsy.
  - For "biopsy-only" cases, the subsequent prostatectomy field is a required field.
- NOTE: "Biopsy-Only" cases are cases due to advance disease or other reasons that did NOT lead to a prostatectomy.

**135. Biopsy: Most Prominent Histological Type of Invasive Cancer (Circle One)**

Adenocarcinoma NOS (aka acinar)                      Undifferentiated non-small cell carcinoma

Mucinous adenocarcinoma                      Signet ring adenocarcinoma                      Lymphoma

Transitional (not primary)                      Ductal adenocarcinoma                      Neuroendocrine carcinoma

Small cell anaplastic carcinoma                      Sarcomatoid carcinoma                      Basal cell carcinoma

Squamous or adenosquamous carcinoma                      Mesenchymal tumor (NOS)

PIN only                      Unknown                      Other (specify in comments)

**136. Biopsy: Primary Gleason Grade: (Circle One)**

Gleason grade: 1                      2                      3                      4                      5

not adenocarcinoma                      not primary tumor                      Unknown                      PIN only

**137. Biopsy: Secondary Gleason Grade: (Circle One)**

Gleason grade: 1                      2                      3                      4                      5

not adenocarcinoma                      not primary tumor                      Unknown                      PIN only

**138. Biopsy: Gleason Sum Score: (Circle One)**

Gleason score 2                      Gleason score 3                      Gleason score 4

Gleason score 5                      Gleason score 6                      Gleason score 7

Gleason score 8                      Gleason score 9                      Gleason score 10

not adenocarcinoma                      not primary tumor                      unknown

**139. Biopsy: Percentage of Gleason 4/5 grade (in all of 6's and 7's)**

\_\_\_ \_\_\_ \_\_\_ % (0.x – 100 %, -1 = unknown)

**140. Percentage of Biopsy Occupied by Tumor: (Circle One)**

<5%                      5 to 25%                      >25%                      Unknown

**141. Biopsy: Presence of High Grade Prostatic Intraepithelial Neoplasia: (Circle One)**

Yes - # of foci unknown                      Yes – 1 or 2 foci in region of tumor  
Yes – 1 or 2 foci away from tumor                      Yes – multifocal  
No                      Unknown

**142. Biopsy: Non-Neoplastic Block #1:**

Accession and Block # (i.e. SP-91-645-1A):

\_\_\_\_\_ - \_\_\_\_\_ - \_\_\_\_\_ - \_\_\_\_\_ - \_\_\_\_\_ - \_\_\_\_\_ - \_\_\_\_\_ - \_\_\_\_\_ - \_\_\_\_\_ - \_\_\_\_\_

**143. Subsequent Prostatectomy:\*\* (Circle One)**

Definition: **Specifies whether a subsequent prostatectomy occurred. This field will help clarify cases where only biopsy specimens are available.**

Yes                      No                      Unknown

**144. Subsequent Prostatectomy comments:**

---

---

---

---

**145. General Comments on Biopsy:**

---

---

---

---
